# Supplementary material for: Genome-Wide Identification of Rare and Common Variants Driving Triglyceride Levels in a Nevada Population
Source: Front Genet. 2021 Mar 2;12:639418. doi: 10.3389/fgene.2021.639418 (PMC7982958; doi:10.3389/fgene.2021.639418)
Supplement: Supplementary file 6 [file Table_5.xlsx]

## Sheet: Trig.SigSNP.InfoAnn_feb32021
Table S5: Significant HNPT Single-variant GWAS associations
Variant ID	rsID	Published Association to Triglyceride Levels in PhenoScanner	Published Association to Triglyceride Levels in ClinVar	Published Association to Triglyceride Levels in GWAS catalog	Chrom	BP	Gene via RefSeq and NCBI	Gene via PhenoScanner	Cytoband	Ref	Tested	Num Tested	β	Genotype P-value	MAF	Consequence RefSeq and NCBI	Consequence PhenoScanner
chr1:9806740:G:A	rs148878941	N	N	N	chr1	9806740	CLSTN1	CLSTN1	p36.22	G	A	9051	139.6	2.184e-13	0.0006077	intron	intron
chr1:36784454:G:A	rs78437162	N	N	N	chr1	36784454	NA	RP4NA614N24.1	p34.3	G	A	9178	117.9	2.871e-09	0.0005448	unknown	intergenic
chr1:36787147:G:A	rs114593704	N	N	N	chr1	36787147	NA	GRIK3	p34.3	G	A	9176	117.9	2.909e-09	0.0005449	unknown	intergenic
chr1:78426949:AC:A	rs149694882	N	N	N	chr1	78426949	NA	PTGFR	p31.1	AC	A	9179	116.2	4.706e-09	0.0005447	unknown	indel
chr1:78442546:C:G	rs17101736	N	N	N	chr1	78442546	NA	PTGFR	p31.1	C	G	9180	116.2	4.69e-09	0.0005447	unknown	intron
chr1:78445131:G:A	rs17101744	N	N	N	chr1	78445131	NA	PTGFR	p31.1	G	A	9180	116.2	4.69e-09	0.0005447	unknown	intron
chr1:83708231:A:C	rs6664915	N	N	N	chr1	83708231	LINC01725	LINC01725	p31.1	A	C	9169	117.6	5.538e-10	0.0005998	intron	intron
chr1:87377213:C:T	rs111936106	N	N	N	chr1	87377213	NA	LINC01364	p22.3	C	T	9058	112.3	3.43e-09	0.0006072	unknown	intergenic
chr1:89709912:C:G	rs144888076	N	N	N	chr1	89709912	LRRC8C	LRRC8C	p22.2	C	G	9112	116.2	4.763e-09	0.0005487	intron	intron
chr1:89717375:G:T	rs114156500	N	N	N	chr1	89717375	LRRC8C	LRRC8C	p22.2	G	T	9183	116.3	4.629e-09	0.0005445	untranslated-3	3_prime_UTR
chr1:199258984:A:T	rs546245268	N	N	N	chr1	199258984	LOC400800, LINC02789	RP11NA382E9.1	q32.1	A	T	9097	97.16	2.357e-09	0.0008244	intron	intron
chr1:199258984:A:T	rs1336472324	N	N	N	chr1	199258984	LOC400800, LINC02789	NA	q32.1	A	T	9097	97.16	2.357e-09	0.0008244	intron	NA
chr1:199266639:C:T	rs10919652	N	N	N	chr1	199266639	LOC400800, LINC02789	RP11NA382E9.1	q32.1	C	T	9138	97.03	2.403e-09	0.0008207	intron	intron
chr1:220170806:T:C	rs147250881	N	N	N	chr1	220170806	RAB3GAP2	RAB3GAP2	q41	T	C	9057	100.3	1.863e-10	0.0006625	intron	intron
chr1:234420733:G:A	rs140244260	N	N	N	chr1	234420733	TARBP1	TARBP1	q42.2	G	A	9180	103.7	7.457e-10	0.0006536	ncRNA, missense	missense
chr1:245247818:G:T	rs12045578	N	N	N	chr1	245247818	KIF26B	KIF26B	q44	G	T	9164	92.96	3.712e-09	0.000873	intron	intron
chr2:27359168:A:G	rs9678013	N	N	N	chr2	27359168	GTF3C2	GTF3C2	p23.3	A	G	8731	-6.429	2.116e-11	0.4333	unknown	upstream
chr2:27360289:G:A	rs6729709	N	N	N	chr2	27360289	GTF3C2	GTF3C2	p23.3	G	A	8779	-6.405	2.505e-11	0.4354	unknown	upstream
chr2:27412596:A:G	rs386644219	N	N	N	chr2	27412596	NA	NA	p23.3	A	A	8155	7.852	2.374e-13	0.2994	unknown	NA
chr2:27412596:A:G	rs1728918	Y	N	N	chr2	27412596	NA	NA	p23.3	A	A	8155	7.852	2.374e-13	0.2994	unknown	NA
chr2:27433955:G:GA	rs1309034545	N	N	N	chr2	27433955	NRBP1	NA	p23.3	G	GA	8098	-6.339	1.009e-10	0.4396	intron	NA
chr2:27433955:G:GA	rs3214499	N	N	N	chr2	27433955	NRBP1	NRBP1	p23.3	G	GA	8098	-6.339	1.009e-10	0.4396	intron	indel
chr2:27508073:T:C	rs1260326	Y	N	Y	chr2	27508073	GCKR	GCKR	p23.3	T	T	9175	9.347	2.768e-23	0.4088	near-gene-3, missense	missense
chr2:27518370:T:C	rs1200670310	N	N	N	chr2	27518370	GCKR	NA	p23.3	T	T	9175	9.158	2.658e-22	0.4001	intron	NA
chr2:27518370:T:C	rs780094	Y	N	Y	chr2	27518370	GCKR	GCKR	p23.3	T	T	9175	9.158	2.658e-22	0.4001	intron	intron
chr2:27519736:T:C	rs780093	Y	N	Y	chr2	27519736	GCKR	GCKR	p23.3	T	T	9110	8.875	5.189e-21	0.4006	intron	intron
chr2:27521497:ATT:A	rs1379316865	N	N	N	chr2	27521497	GCKR	NA	p23.3	ATT	ATT	8882	7.586	1.135e-15	0.4563	intron	NA
chr2:27525730:C:A	rs1260334	Y	N	N	chr2	27525730	NA	GCKR	p23.3	C	C	8442	7.327	9.007e-14	0.4783	unknown	downstream
chr2:27525757:A:G	rs1260333	Y	N	Y	chr2	27525757	NA	GCKR	p23.3	A	A	8634	7.307	6.21e-14	0.4723	unknown	downstream
chr2:27556134:CAAA:C	rs1222884147	N	N	N	chr2	27556134	NA	NA	p23.3	CAAA	C	8902	5.985	7.229e-09	0.2963	unknown	NA
chr2:27556134:CAAA:C	rs1474470648	N	N	N	chr2	27556134	NA	NA	p23.3	CAAA	C	8902	5.985	7.229e-09	0.2963	unknown	NA
chr2:27556134:CAAA:C	rs1491220351	N	N	N	chr2	27556134	NA	NA	p23.3	CAAA	C	8902	5.985	7.229e-09	0.2963	unknown	NA
chr2:27556284:CTT:C	rs1171897704	N	N	N	chr2	27556284	NA	NA	p23.3	CTT	C	8999	6.728	1.264e-10	0.2789	unknown	NA
chr2:27556284:CTT:C	rs1435363980	N	N	N	chr2	27556284	NA	NA	p23.3	CTT	C	8999	6.728	1.264e-10	0.2789	unknown	NA
chr2:27578626:T:C	rs1919127	Y	N	N	chr2	27578626	C2orf16	C2orf16	p23.3	T	C	9183	6.952	1.948e-11	0.2797	missense	missense
chr2:27578892:A:G	rs1919128	Y	N	Y	chr2	27578892	C2orf16	C2orf16	p23.3	A	G	9183	6.962	1.838e-11	0.2788	missense	missense
chr2:27589385:G:A	rs6760250	Y	N	N	chr2	27589385	ZNF512	ZNF512	p23.3	G	A	9030	6.877	4.488e-11	0.2777	intron	intron
chr2:27629051:G:A	rs3749147	Y	N	Y	chr2	27629051	GPN1	GPN1	p23.3	G	A	9181	6.601	3.937e-10	0.2566	intron, near-gene-5, ncRNA, missense	missense
chr2:31415564:G:A	rs45496698	N	N	N	chr2	31415564	NA	NA	p23.1	G	A	9109	118	6.376e-10	0.0006038	near-gene-5	NA
chr2:31547895:T:G	rs928457634	N	N	N	chr2	31547895	SRD5A2	NA	p23.1	T	G	9149	115.6	1.512e-09	0.0006012	intron	NA
chr2:31547895:T:G	rs28745289	N	N	N	chr2	31547895	SRD5A2	SRD5A2	p23.1	T	G	9149	115.6	1.512e-09	0.0006012	intron	intron
chr2:33486698:G:A	rs113323094	N	N	N	chr2	33486698	RASGRP3	RASGRP3	p22.3	G	A	8908	125.9	2.949e-11	0.0006174	intron	intron
chr2:33490360:G:A	rs111601879	N	N	N	chr2	33490360	RASGRP3	RASGRP3	p22.3	G	A	8909	123.7	6.577e-11	0.0006174	intron	intron
chr2:33500709:G:A	rs188686490	N	N	N	chr2	33500709	RASGRP3	RASGRP3	p22.3	G	A	8921	119.6	2.687e-10	0.0006165	intron	intron
chr2:33502555:G:C	rs186938181	N	N	N	chr2	33502555	RASGRP3	RASGRP3	p22.3	G	C	8940	111.2	4.32e-09	0.0006152	intron	intron
chr2:33505730:C:T	rs73926684	N	N	N	chr2	33505730	RASGRP3	RASGRP3	p22.3	C	T	8950	127.7	1.251e-10	0.0005587	intron	intron
chr2:37623763:C:T	rs78263038	N	N	N	chr2	37623763	NA	AC006369.2	p22.2	C	T	9176	114.2	1.682e-09	0.0005994	unknown	intron
chr2:40637008:T:C	rs79452849	N	N	N	chr2	40637008	LOC105374475	SLC8A1	p22.1	T	C	9166	135.3	1.076e-11	0.0005455	intron	intergenic
chr2:97743396:C:T	rs144255690	N	N	N	chr2	97743396	ZAP70	ZAP70	q11.2	C	T	9147	115.8	6.241e-09	0.0005466	intron, untranslated-3	downstream
chr2:169443874:A:G	rs112179501	N	N	N	chr2	169443874	NA	BBS5	q31.1	A	G	9155	119.7	1.806e-09	0.0005461	unknown	intergenic
chr2:190954736:T:G	rs200986458	N	N	N	chr2	190954736	GLS	GLS	q32.2	T	G	9151	122.6	1.424e-11	0.0006557	intron	intron
chr2:233905592:T:A	rs60573749	N	N	N	chr2	233905592	NA	STK25	q37.1	T	A	8236	136.2	1.22e-11	0.0006071	unknown	intergenic
chr3:15956582:G:A	rs1357884545	N	N	N	chr3	15956582	NA	NA	p25.1	G	A	7333	106.3	7.804e-09	0.0008182	unknown	NA
chr3:15956582:G:A	rs1361909695	N	N	N	chr3	15956582	NA	NA	p25.1	G	A	7333	106.3	7.804e-09	0.0008182	unknown	NA
chr3:15956582:G:A	rs375932869	N	N	N	chr3	15956582	NA	LINC00690	p25.1	G	A	7333	106.3	7.804e-09	0.0008182	unknown	intergenic
chr3:37951102:T:C	rs75455318	N	N	N	chr3	37951102	CTDSPL	CTDSPL	p22.2	T	C	9048	108.1	4.613e-13	0.0008842	intron	intron
chr3:50188198:T:A	rs200144707	N	N	N	chr3	50188198	SEMA3F	SEMA3F	p21.31	T	A	8999	164	1.823e-16	0.0005556	near-gene-3, untranslated-3	3_prime_UTR
chr3:50188198:T:A	rs1199338430	N	N	N	chr3	50188198	SEMA3F	NA	p21.31	T	A	8999	164	1.823e-16	0.0005556	near-gene-3, untranslated-3	NA
chr3:53194891:C:T	rs116988382	N	N	N	chr3	53194891	NA	PRKCD	p21.1	C	T	9163	135.8	8.756e-12	0.0005457	unknown	downstream
chr3:53209640:C:T	rs140120877	N	N	N	chr3	53209640	NA	AC097015.1	p21.1	C	T	9137	117.5	3.567e-09	0.0005472	unknown	downstream
chr3:122777900:T:C	rs141356063	N	N	N	chr3	122777900	HSPBAP1	HSPBAP1	q21.1	T	C	8249	111.6	3.34e-10	0.000788	intron, ncRNA, missense, untranslated-5	missense
chr3:125777164:G:A	rs143333054	N	N	N	chr3	125777164	LOC105374312	RP11NA379B18.6	q21.2	G	A	9177	113.9	6.725e-11	0.0007083	intron	intron
chr3:125777319:C:G	rs143251708	N	N	N	chr3	125777319	LOC105374312	RP11NA379B18.6	q21.2	C	G	9178	117.8	8.62e-11	0.0006537	intron	intron
chr3:125777493:C:T	rs144004695	N	N	N	chr3	125777493	LOC105374312	RP11NA379B18.6	q21.2	C	T	9181	113.9	6.801e-11	0.000708	intron	intron
chr3:125777593:T:C	rs571394142	N	N	N	chr3	125777593	LOC105374312	RP11NA379B18.6	q21.2	T	C	9180	117.8	8.757e-11	0.0006536	intron	intron
chr3:125777608:T:C	rs536889149	N	N	N	chr3	125777608	LOC105374312	RP11NA379B18.6	q21.2	T	C	9180	117.8	8.757e-11	0.0006536	intron	intron
chr3:125777633:T:G	rs376051792	N	N	N	chr3	125777633	LOC105374312	RP11NA379B18.6	q21.2	T	G	9180	117.8	8.757e-11	0.0006536	intron	intron
chr3:125777637:T:C	rs572816750	N	N	N	chr3	125777637	LOC105374312	RP11NA379B18.6	q21.2	T	C	9180	117.8	8.757e-11	0.0006536	intron	intron
chr3:125777691:T:C	rs139401296	N	N	N	chr3	125777691	LOC105374312	RP11NA379B18.6	q21.2	T	C	9180	117.8	8.757e-11	0.0006536	intron	intron
chr3:125777771:G:C	rs187409396	N	N	N	chr3	125777771	LOC105374312	RP11NA379B18.6	q21.2	G	C	9181	113.9	6.801e-11	0.000708	intron	intron
chr3:125778263:G:T	rs146236155	N	N	N	chr3	125778263	LOC105374312	RP11NA379B18.6	q21.2	G	T	9178	117.8	8.747e-11	0.0006537	intron	intron
chr3:125778318:C:T	rs149960794	N	N	N	chr3	125778318	LOC105374312	RP11NA379B18.6	q21.2	C	T	9179	113.9	6.829e-11	0.0007081	intron	intron
chr3:125778368:G:A	rs142755830	N	N	N	chr3	125778368	LOC105374312	RP11NA379B18.6	q21.2	G	A	9181	113.9	6.801e-11	0.000708	intron	intron
chr3:125778391:T:C	rs142432458	N	N	N	chr3	125778391	LOC105374312	RP11NA379B18.6	q21.2	T	C	9180	113.9	6.814e-11	0.0007081	intron	intron
chr3:125778439:A:C	rs146828471	N	N	N	chr3	125778439	LOC105374312	RP11NA379B18.6	q21.2	A	C	9180	113.9	6.816e-11	0.0007081	intron	intron
chr3:125778516:A:G	rs187903257	N	N	N	chr3	125778516	LOC105374312	RP11NA379B18.6	q21.2	A	G	9177	113.9	6.84e-11	0.0007083	intron	intron
chr3:125778599:T:C	rs139228432	N	N	N	chr3	125778599	LOC105374312	RP11NA379B18.6	q21.2	T	C	9170	117.8	8.588e-11	0.0006543	intron	intron
chr3:125778620:T:C	rs184599935	N	N	N	chr3	125778620	LOC105374312	RP11NA379B18.6	q21.2	T	C	9176	117.8	8.823e-11	0.0006539	intron	intron
chr3:125778625:G:A	rs140533243	N	N	N	chr3	125778625	LOC105374312	RP11NA379B18.6	q21.2	G	A	9176	117.8	8.809e-11	0.0006539	intron	intron
chr3:125778632:A:G	rs150488930	N	N	N	chr3	125778632	LOC105374312	RP11NA379B18.6	q21.2	A	G	9175	117.8	8.795e-11	0.000654	intron	intron
chr3:125778717:C:T	rs149468357	N	N	N	chr3	125778717	LOC105374312	RP11NA379B18.6	q21.2	C	T	9177	113.9	6.902e-11	0.0007083	intron	intron
chr3:125778734:A:G	rs145938612	N	N	N	chr3	125778734	LOC105374312	RP11NA379B18.6	q21.2	A	G	9179	131.2	5.173e-13	0.0006537	intron	intron
chr3:125778759:C:T	rs138609344	N	N	N	chr3	125778759	LOC105374312	RP11NA379B18.6	q21.2	C	T	9180	131.2	5.161e-13	0.0006536	intron	intron
chr3:125778961:G:A	rs146202062	N	N	N	chr3	125778961	LOC105374312	RP11NA379B18.6	q21.2	G	A	9181	113.9	6.801e-11	0.000708	intron	intron
chr3:125779069:T:C	rs114199587	N	N	N	chr3	125779069	LOC105374312	RP11NA379B18.6	q21.2	T	C	9173	113.9	6.848e-11	0.0007086	intron	intron
chr3:125779098:T:C	rs371549521	N	N	N	chr3	125779098	LOC105374312	RP11NA379B18.6	q21.2	T	C	9172	114	6.819e-11	0.0007087	intron	intron
chr3:125779107:G:A	rs142590446	N	N	N	chr3	125779107	LOC105374312	RP11NA379B18.6	q21.2	G	A	9178	113.9	6.802e-11	0.0007082	intron	intron
chr3:125779243:C:T	rs147662300	N	N	N	chr3	125779243	LOC105374312	RP11NA379B18.6	q21.2	C	T	9181	113.9	6.801e-11	0.000708	intron	intron
chr3:125779811:C:T	rs144622066	N	N	N	chr3	125779811	LOC105374312	RP11NA379B18.6	q21.2	C	T	9181	113.9	6.801e-11	0.000708	intron	intron
chr3:125779955:A:G	rs138534685	N	N	N	chr3	125779955	LOC105374312	RP11NA379B18.6	q21.2	A	G	9176	113.9	6.786e-11	0.0007084	intron	intron
chr3:125780103:A:T	rs528988715	N	N	N	chr3	125780103	LOC105374312	RP11NA379B18.6	q21.2	A	T	9181	113.9	6.801e-11	0.000708	intron	intron
chr3:125780104:T:C	rs181979480	N	N	N	chr3	125780104	LOC105374312	RP11NA379B18.6	q21.2	T	C	9181	113.9	6.801e-11	0.000708	intron	intron
chr3:125780194:C:T	rs186286882	N	N	N	chr3	125780194	LOC105374312	RP11NA379B18.6	q21.2	C	T	9181	113.9	6.801e-11	0.000708	intron	intron
chr3:125780282:C:A	rs374099452	N	N	N	chr3	125780282	LOC105374312	RP11NA379B18.6	q21.2	C	A	9180	114.2	5.972e-11	0.0007081	intron	intron
chr3:125780282:C:A	rs1470188131	N	N	N	chr3	125780282	LOC105374312	NA	q21.2	C	A	9180	114.2	5.972e-11	0.0007081	intron	NA
chr3:125780486:C:T	rs148698702	N	N	N	chr3	125780486	LOC105374312	RP11NA379B18.6	q21.2	C	T	9179	113.9	6.791e-11	0.0007081	intron	intron
chr3:125780671:G:A	rs368684064	N	N	N	chr3	125780671	LOC105374312	RP11NA379B18.6	q21.2	G	A	9181	113.9	6.801e-11	0.000708	intron	intron
chr3:125780759:A:G	rs140735422	N	N	N	chr3	125780759	LOC105374312	RP11NA379B18.6	q21.2	A	G	9181	113.9	6.801e-11	0.000708	intron	intron
chr3:125781293:T:C	rs191370619	N	N	N	chr3	125781293	LOC105374312	RP11NA379B18.6	q21.2	T	C	9151	144.7	3.6e-13	0.0005464	intron	intron
chr3:125781336:A:G	rs553009619	N	N	N	chr3	125781336	LOC105374312	RP11NA379B18.6	q21.2	A	G	9181	144.6	3.443e-13	0.0005446	intron	intron
chr3:125782304:G:A	rs538902517	N	N	N	chr3	125782304	LOC105374312	RP11NA379B18.6	q21.2	G	A	9181	113.9	6.801e-11	0.000708	intron	intron
chr3:125782488:C:T	rs150150221	N	N	N	chr3	125782488	LOC105374312	RP11NA379B18.6	q21.2	C	T	9179	127.3	2.399e-12	0.0006537	intron	intron
chr3:125782583:G:A	rs139758054	N	N	N	chr3	125782583	LOC105374312	RP11NA379B18.6	q21.2	G	A	9181	113.9	6.801e-11	0.000708	intron	intron
chr3:125782802:G:A	rs114661248	N	N	N	chr3	125782802	LOC105374312	RP11NA379B18.6	q21.2	G	A	9169	100.9	2.1e-09	0.0007634	intron	intron
chr3:125783234:T:A	rs146891402	N	N	N	chr3	125783234	LOC105374312	RP11NA379B18.6	q21.2	T	A	9179	127.3	2.407e-12	0.0006537	intron	intron
chr3:125783538:T:G	rs144885711	N	N	N	chr3	125783538	LOC105374312	RP11NA379B18.6	q21.2	T	G	9181	113.9	6.801e-11	0.000708	intron	intron
chr3:125784066:C:T	rs144289956	N	N	N	chr3	125784066	LOC105374312	RP11NA379B18.6	q21.2	C	T	9181	113.9	6.801e-11	0.000708	intron	intron
chr3:125784196:C:CTTGT	rs568632117	N	N	N	chr3	125784196	LOC105374312	RP11NA379B18.6	q21.2	C	CTTGT	9178	113.9	6.822e-11	0.0007082	intron	indel
chr3:125784286:G:C	rs142984268	N	N	N	chr3	125784286	LOC105374312	RP11NA379B18.6	q21.2	G	C	9176	113.9	6.857e-11	0.0007084	intron	intron
chr3:125784438:G:A	rs151109236	N	N	N	chr3	125784438	LOC105374312	RP11NA379B18.6	q21.2	G	A	9181	113.9	6.801e-11	0.000708	intron	intron
chr3:125784596:A:T	rs115142304	N	N	N	chr3	125784596	LOC105374312	RP11NA379B18.6	q21.2	A	T	9181	113.9	6.801e-11	0.000708	intron	intron
chr3:125784919:G:A	rs147808732	N	N	N	chr3	125784919	LOC105374312	NA	q21.2	G	A	9181	113.9	6.801e-11	0.000708	intron	NA
chr3:125785441:G:A	rs116699242	N	N	N	chr3	125785441	LOC105374312	RP11NA379B18.6	q21.2	G	A	8883	134.4	1.65e-12	0.0006192	intron	intron
chr3:125785564:T:G	rs1811804	N	N	N	chr3	125785564	LOC105374312	RP11NA379B18.6	q21.2	T	G	9120	85.53	1.385e-10	0.001206	intron	intron
chr3:125786044:G:A	rs116448464	N	N	N	chr3	125786044	LOC105374312	RP11NA379B18.6	q21.2	G	A	9180	113.9	6.807e-11	0.0007081	intron	intron
chr3:125786227:A:G	rs114289319	N	N	N	chr3	125786227	LOC105374312	RP11NA379B18.6	q21.2	A	G	9176	127.3	2.427e-12	0.0006539	intron	intron
chr3:125786432:A:G	rs145670601	N	N	N	chr3	125786432	LOC105374312	RP11NA379B18.6	q21.2	A	G	9157	114	6.708e-11	0.0007098	intron	intron
chr3:125786439:C:A	rs148897772	N	N	N	chr3	125786439	LOC105374312	RP11NA379B18.6	q21.2	C	A	9152	113.9	7.096e-11	0.0007102	intron	intron
chr3:125787122:T:G	rs147528920	N	N	N	chr3	125787122	LOC105374312	RP11NA379B18.6	q21.2	T	G	9054	157.6	1.698e-15	0.0005522	intron	intron
chr3:125787309:G:A	rs139455927	N	N	N	chr3	125787309	LOC105374312	RP11NA379B18.6	q21.2	G	A	9175	113.9	6.914e-11	0.0007084	intron	intron
chr3:125787420:G:T	rs144982615	N	N	N	chr3	125787420	LOC105374312	RP11NA379B18.6	q21.2	G	T	9180	113.9	6.797e-11	0.0007081	intron	intron
chr3:125787420:G:T	rs1487584698	N	N	N	chr3	125787420	LOC105374312	NA	q21.2	G	T	9180	113.9	6.797e-11	0.0007081	intron	NA
chr3:125787465:G:T	rs147598892	N	N	N	chr3	125787465	LOC105374312	RP11NA379B18.6	q21.2	G	T	9180	113.9	6.797e-11	0.0007081	intron	intron
chr3:125787469:C:CA	rs577191666	N	N	N	chr3	125787469	LOC105374312	RP11NA379B18.6	q21.2	C	CA	9179	113.9	6.817e-11	0.0007081	intron	indel
chr3:125788111:G:A	rs116761783	N	N	N	chr3	125788111	LOC105374312	RP11NA379B18.1	q21.2	G	A	9170	136.7	5.742e-13	0.0005998	intron	non_coding_transcript_exon
chr3:125788201:A:G	rs114768216	N	N	N	chr3	125788201	LOC105374312	RP11NA379B18.6	q21.2	A	G	9169	113.9	6.91e-11	0.0007089	intron	intron
chr3:125788509:T:C	rs149584338	N	N	N	chr3	125788509	LOC105374312	RP11NA379B18.6	q21.2	T	C	8843	127.7	1.654e-12	0.0006785	intron	intron
chr3:125788820:A:G	rs140177561	N	N	N	chr3	125788820	LOC105374312	RP11NA379B18.6	q21.2	A	G	9104	131.1	5.372e-13	0.0006591	intron	intron
chr3:125789001:C:A	rs145499299	N	N	N	chr3	125789001	LOC105374312	RP11NA379B18.6	q21.2	C	A	9162	131.2	4.422e-13	0.0006549	intron	intron
chr3:125789121:G:A	rs144075814	N	N	N	chr3	125789121	LOC105374312	RP11NA379B18.6	q21.2	G	A	9164	113.9	6.954e-11	0.0007093	intron	intron
chr3:125789522:T:C	rs144217829	N	N	N	chr3	125789522	LOC105374312	RP11NA379B18.6	q21.2	T	C	9172	122.9	9.479e-11	0.0005997	intron	intron
chr3:125789850:T:C	rs141791008	N	N	N	chr3	125789850	LOC105374312	RP11NA379B18.6	q21.2	T	C	9180	113.9	6.797e-11	0.0007081	intron	intron
chr3:125789918:G:A	rs115079386	N	N	N	chr3	125789918	LOC105374312	RP11NA379B18.6	q21.2	G	A	9175	136.7	5.69e-13	0.0005995	intron, near-gene-3	intron
chr3:154938032:G:A	rs78456820	N	N	N	chr3	154938032	LOC105374171	SPTSSB	q25.2	G	A	9164	110.9	2.488e-10	0.0007093	ncRNA	intergenic
chr3:154941351:C:CAA	rs1253498241	N	N	N	chr3	154941351	LOC105374171	NA	q25.2	C	CAA	9173	104.4	2.45e-09	0.0007086	intron	NA
chr3:154941351:C:CAA	rs553543205	N	N	N	chr3	154941351	LOC105374171	NA	q25.2	C	CAA	9173	104.4	2.45e-09	0.0007086	intron	NA
chr3:154951382:C:A	rs187496387	N	N	N	chr3	154951382	LOC105374171	SPTSSB	q25.2	C	A	9159	102.5	5.128e-09	0.0007097	intron	intergenic
chr4:89932382:G:A	rs146247376	N	N	N	chr4	89932382	MMRN1	MMRN1	q22.1	G	A	9179	135.9	7.679e-12	0.0005447	intron	intron
chr4:89969403:C:T	rs148068656	N	N	N	chr4	89969403	NA	LNCPRESS2	q22.1	C	T	9165	135.9	7.278e-12	0.0005456	unknown	intergenic
chr4:90004268:T:C	rs115960085	N	N	N	chr4	90004268	NA	LNCPRESS2	q22.1	T	C	9167	118.7	2.287e-09	0.0005454	unknown	intergenic
chr4:90567083:C:A	rs143559249	N	N	N	chr4	90567083	CCSER1	CCSER1	q22.1	C	A	9139	115.2	1.283e-09	0.0006018	intron	intron
chr4:90574677:C:T	rs116088426	N	N	N	chr4	90574677	CCSER1	CCSER1	q22.1	C	T	8949	119.1	2.481e-09	0.0005587	intron	intron
chr4:90579430:A:C	rs111772957	N	N	N	chr4	90579430	CCSER1	CCSER1	q22.1	A	C	9128	105	1.821e-09	0.0007121	intron	intron
chr4:90580782:C:T	rs115856833	N	N	N	chr4	90580782	CCSER1	CCSER1	q22.1	C	T	9137	115.2	1.277e-09	0.0006019	intron	intron
chr4:90584448:G:A	rs7688318	N	N	N	chr4	90584448	CCSER1	CCSER1	q22.1	G	A	9129	105	1.819e-09	0.000712	intron	intron
chr4:90590294:G:C	rs112041025	N	N	N	chr4	90590294	CCSER1	CCSER1	q22.1	G	C	9129	116.5	1.411e-10	0.0006572	intron	intron
chr4:90592106:C:T	rs115416376	Y	N	N	chr4	90592106	CCSER1	CCSER1	q22.1	C	T	9085	110.5	1.197e-09	0.0006604	intron	intron
chr4:90596189:G:A	rs115691871	N	N	N	chr4	90596189	CCSER1	CCSER1	q22.1	G	A	9142	119.4	1.887e-09	0.0005469	intron	intron
chr4:144391872:A:G	rs11938998	N	N	N	chr4	144391872	LOC105377462	NA	q31.21	A	G	8828	103.6	2.701e-09	0.000623	intron	NA
chr4:144471221:C:T	rs74635781	N	N	N	chr4	144471221	LOC105377462	FHDC1	q31.21	C	T	9172	96.75	8.434e-09	0.0006542	intron	intergenic
chr4:144481549:C:T	rs113933056	N	N	N	chr4	144481549	LOC105377462	FHDC1	q31.21	C	T	9171	96.75	8.451e-09	0.0006542	intron	intergenic
chr4:144482002:T:A	rs115253237	N	N	N	chr4	144482002	LOC105377462	FHDC1	q31.21	T	A	9172	96.75	8.434e-09	0.0006542	intron	intergenic
chr4:177533011:G:A	rs73865132	N	N	N	chr4	177533011	LOC285500	RP11NA130F10.1	q34.3	G	A	6579	112	4.798e-09	0.000836	intron	intron
chr4:179851457:T:A	rs73005927	N	N	N	chr4	179851457	NA	NA	q34.3	T	A	9145	119.5	1.683e-09	0.0005467	unknown	NA
chr4:181542350:C:T	rs7697865	N	N	N	chr4	181542350	TENM3	RN7SKP13	q34.3	C	T	6084	89.75	2.615e-09	0.001479	intron	intergenic
chr4:185592605:G:A	rs114794819	N	N	N	chr4	185592605	SORBS2	SORBS2	q35.1	G	A	8887	125.6	4.439e-11	0.0006189	intron	intron
chr4:185841603:A:G	rs7686451	N	N	N	chr4	185841603	SORBS2	SORBS2	q35.1	A	A	9151	96.13	1.055e-09	0.0007649	intron	intron
chr5:39288783:C:T	rs137891079	N	N	N	chr5	39288783	C9	C9	p13.1	C	T	9178	102.8	3.457e-09	0.0007082	missense	missense
chr5:101331953:T:C	rs74538423	N	N	N	chr5	101331953	NA	RP11NA231G15.1	q21.1	T	C	8938	115.8	1.101e-09	0.0006154	unknown	intergenic
chr5:115962806:G:C	rs149460330	N	N	N	chr5	115962806	LVRN	NA	q23.1	G	C	9181	108.4	2.685e-09	0.0006535	coding-synon, missense	NA
chr5:148339361:T:G	rs73795091	N	N	N	chr5	148339361	LOC102546294, SPINK9	SPINK9	q32	T	G	8462	91.36	1.188e-11	0.0013	intron	intron
chr5:160311842:G:C	rs200773887	N	N	N	chr5	160311842	CCNJL	CCNJL	q33.3	G	C	8903	131.8	4.603e-11	0.0005616	intron	intron
chr5:178468354:G:C	rs114862728	N	N	N	chr5	178468354	COL23A1	COL23A1	q35.3	G	C	9132	151.5	2.281e-14	0.0005475	intron	intron
chr5:178469024:C:T	rs7709200	N	N	N	chr5	178469024	COL23A1	COL23A1	q35.3	C	T	9147	107.6	1.529e-10	0.0007653	intron	intron
chr5:178524906:T:C	rs28699028	N	N	N	chr5	178524906	COL23A1	COL23A1	q35.3	T	C	9139	116.9	2.01e-11	0.0007112	intron	intron
chr5:178531997:C:G	rs10043739	N	N	N	chr5	178531997	COL23A1	COL23A1	q35.3	C	G	9163	87.73	3.401e-09	0.0009822	intron	intron
chr5:178532444:G:GTCCAGA	rs1181362086	N	N	N	chr5	178532444	COL23A1	NA	q35.3	G	GTCCAGA	9172	86.87	4.711e-09	0.0009812	intron	NA
chr5:178532444:G:GTCCAGA	rs527914686	N	N	N	chr5	178532444	COL23A1	COL23A1	q35.3	G	GTCCAGA	9172	86.87	4.711e-09	0.0009812	intron	indel
chr6:11286905:C:T	rs73721524	N	N	N	chr6	11286905	NEDD9	NEDD9	p24.2	C	T	9162	180.1	1.931e-21	0.0006003	intron	intron
chr6:11287317:G:A	rs386697096	N	N	N	chr6	11287317	NEDD9	NEDD9	p24.2	G	A	9168	66.76	4.184e-09	0.001691	intron	indel
chr6:11287317:G:A	rs139314226	N	N	N	chr6	11287317	NEDD9	NA	p24.2	G	A	9168	66.76	4.184e-09	0.001691	intron	NA
chr6:11292836:C:T	rs117502343	N	N	N	chr6	11292836	NEDD9, LOC105374925	NEDD9	p24.2	C	T	9183	119.5	1.908e-13	0.0008167	intron	intron
chr6:11295350:T:C	rs75809504	N	N	N	chr6	11295350	NEDD9, LOC105374925	NEDD9	p24.2	T	C	9181	143.3	2.012e-16	0.000708	intron, near-gene-5	intron
chr6:11295635:CA:C	rs139180429	N	N	N	chr6	11295635	NEDD9, LOC105374925	NEDD9	p24.2	CA	C	9183	128	2.617e-14	0.0007623	intron, near-gene-5	indel
chr6:11298612:T:C	rs75435318	N	N	N	chr6	11298612	NEDD9, LOC105374925	NEDD9	p24.2	T	C	9183	128	2.617e-14	0.0007623	intron, near-gene-5	intron
chr6:11299577:G:T	rs140764311	N	N	N	chr6	11299577	NEDD9, LOC105374925	NEDD9	p24.2	G	T	9172	143.3	2.034e-16	0.0007087	intron	intron
chr6:11300691:A:T	rs141874168	N	N	N	chr6	11300691	NEDD9, LOC105374925	NEDD9	p24.2	A	T	9183	128	2.617e-14	0.0007623	intron	intron
chr6:11301632:G:C	rs139749723	N	N	N	chr6	11301632	NEDD9, LOC105374925	NEDD9	p24.2	G	C	9181	128	2.569e-14	0.0007624	intron	intron
chr6:11301720:A:C	rs144002219	N	N	N	chr6	11301720	NEDD9, LOC105374925	NEDD9	p24.2	A	C	9182	136.9	4.122e-15	0.0007079	intron	intron
chr6:11302035:G:T	rs148641253	N	N	N	chr6	11302035	NEDD9, LOC105374925	NEDD9	p24.2	G	T	9183	128	2.617e-14	0.0007623	intron	intron
chr6:11302415:A:G	rs185401925	N	N	N	chr6	11302415	NEDD9, LOC105374925	NEDD9	p24.2	A	G	9182	128	2.59e-14	0.0007624	intron	intron
chr6:11302634:G:A	rs145153279	N	N	N	chr6	11302634	NEDD9, LOC105374925	NEDD9	p24.2	G	A	9149	139.4	1.34e-15	0.0007105	intron	intron
chr6:11302929:G:A	rs148321882	N	N	N	chr6	11302929	NEDD9, LOC105374925	NEDD9	p24.2	G	A	9176	128.1	2.519e-14	0.0007629	intron	intron
chr6:11303164:A:G	rs145772432	N	N	N	chr6	11303164	NEDD9, LOC105374925	NEDD9	p24.2	A	G	9179	128.2	2.009e-13	0.0007081	intron	intron
chr6:11306676:A:G	rs117287915	N	N	N	chr6	11306676	NEDD9, LOC105374925	NEDD9	p24.2	A	G	9182	128	2.626e-14	0.0007624	intron	intron
chr6:11307106:G:A	rs118112368	N	N	N	chr6	11307106	NEDD9, LOC105374925	NEDD9	p24.2	G	A	9183	128	2.617e-14	0.0007623	intron	intron
chr6:11307140:A:T	rs117030224	N	N	N	chr6	11307140	NEDD9, LOC105374925	NEDD9	p24.2	A	T	9181	136.9	4.186e-15	0.000708	intron	intron
chr6:11307533:A:G	rs80014145	N	N	N	chr6	11307533	NEDD9, LOC105374925	NEDD9	p24.2	A	G	9180	144.8	1.46e-15	0.0006536	intron	intron
chr6:11307970:C:T	rs117792277	N	N	N	chr6	11307970	NEDD9, LOC105374925	NEDD9	p24.2	C	T	9181	139.4	1.378e-15	0.000708	intron	intron
chr6:11308523:C:G	rs191153539	N	N	N	chr6	11308523	NEDD9, LOC105374925	NEDD9	p24.2	C	G	9173	149.9	1.501e-16	0.0006541	intron	intron
chr6:30651368:T:G	rs35201959	N	N	N	chr6	30651368	C6orf136	C6orf136	p21.33	T	G	9183	116.1	4.516e-12	0.0007623	coding-synon	synonymous
chr6:30782019:C:T	rs118007622	N	N	N	chr6	30782019	HCG20	HCG20	p21.33	C	T	6725	80.06	5.631e-11	0.001933	intron, ncRNA	non_coding_transcript_exon
chr6:37300982:CT:C	rs377564128	N	N	N	chr6	37300982	TBC1D22B	TBC1D22B	p21.2	CT	C	9170	118.4	2.792e-09	0.0005453	intron	indel
chr6:106113824:A:G	rs77124608	N	N	N	chr6	106113824	NA	ATG5	q21	A	G	9138	101.3	6.915e-09	0.0007113	unknown	intron
chr6:106113944:T:C	rs186745433	N	N	N	chr6	106113944	NA	ATG5	q21	T	C	9142	101.3	6.944e-09	0.000711	unknown	intron
chr6:106114960:G:C	rs80299721	N	N	N	chr6	106114960	NA	ATG5	q21	G	C	9143	99.46	9.613e-10	0.0008203	unknown	intron
chr6:109522363:T:C	rs12665470	N	N	N	chr6	109522363	AK9	AK9	q21	T	C	8994	124.1	6.676e-11	0.0006115	intron	intron
chr6:109873938:T:C	rs73765025	N	N	N	chr6	109873938	NA	RP11NA282C5.1	q21	T	C	9175	109.7	1.729e-09	0.000654	unknown	intergenic
chr6:118975751:C:A	rs9401111	N	N	N	chr6	118975751	FAM184A	FAM184A	q22.31	C	A	8052	96.61	3.977e-09	0.0009314	intron	intron
chr6:121517641:A:C	rs113529284	N	N	N	chr6	121517641	NA	TRMT11	q22.31	A	C	9147	103	3.179e-09	0.0007106	unknown	intergenic
chr6:137633695:ATTAT:A	rs148123768	N	N	N	chr6	137633695	NA	NA	q23.3	ATTAT	A	8863	71.54	8.245e-10	0.00158	unknown	NA
chr6:137633695:ATTAT:A	rs1387995787	N	N	N	chr6	137633695	NA	NA	q23.3	ATTAT	A	8863	71.54	8.245e-10	0.00158	unknown	NA
chr6:145215805:G:A	rs9376902	N	N	N	chr6	145215805	NA	AL356739.1	q24.3	G	A	9160	140.4	1.799e-12	0.0005459	unknown	intergenic
chr6:145219462:A:C	rs9390291	N	N	N	chr6	145219462	NA	AL356739.1	q24.3	A	C	9158	140.4	1.8e-12	0.000546	unknown	intergenic
chr6:145219777:A:G	rs75823635	N	N	N	chr6	145219777	NA	AL356739.1	q24.3	A	G	9160	140.4	1.799e-12	0.0005459	unknown	intergenic
chr6:145220881:C:T	rs142534318	N	N	N	chr6	145220881	NA	AL356739.1	q24.3	C	T	9099	140.4	1.985e-12	0.0005495	unknown	intergenic
chr6:145224695:T:C	rs1370671412	N	N	N	chr6	145224695	NA	NA	q24.3	T	C	9161	140.4	1.797e-12	0.0005458	unknown	NA
chr6:145224695:T:C	rs79036130	N	N	N	chr6	145224695	NA	AL356739.1	q24.3	T	C	9161	140.4	1.797e-12	0.0005458	unknown	intergenic
chr6:145224790:C:T	rs78629771	N	N	N	chr6	145224790	NA	AL356739.1	q24.3	C	T	9161	140.4	1.797e-12	0.0005458	unknown	intergenic
chr6:145282454:T:C	rs117985318	N	N	N	chr6	145282454	NA	AL356739.1	q24.3	T	C	9141	114.7	5.244e-11	0.0007111	unknown	intergenic
chr6:145306099:G:C	rs11155411	N	N	N	chr6	145306099	NA	AL356739.1	q24.3	G	C	9135	97.36	7.65e-09	0.0007663	unknown	intergenic
chr6:145311796:T:A	rs9403688	N	N	N	chr6	145311796	NA	AL356739.1	q24.3	T	A	8162	96.35	2.045e-09	0.0009189	unknown	intergenic
chr6:145318031:G:A	rs9484967	N	N	N	chr6	145318031	NA	NA	q24.3	G	A	9156	113.6	7.512e-11	0.0007099	unknown	NA
chr6:145322464:G:A	rs9373453	N	N	N	chr6	145322464	NA	AL356739.1	q24.3	G	A	9154	106.4	2.566e-10	0.0007647	unknown	intergenic
chr6:145322610:A:G	rs9386111	N	N	N	chr6	145322610	NA	AL356739.1	q24.3	A	G	9150	106.4	2.585e-10	0.000765	unknown	intergenic
chr6:145324431:G:C	rs9376917	N	N	N	chr6	145324431	NA	AL356739.1	q24.3	G	C	9154	106.4	2.566e-10	0.0007647	unknown	intergenic
chr6:145343589:TG:T	rs67835212	N	N	N	chr6	145343589	NA	AL356739.1	q24.3	TG	T	9151	106.3	2.612e-10	0.0007649	unknown	indel
chr7:838795:T:C	rs77466627	N	N	N	chr7	838795	SUN1	SUN1	p22.3	T	C	9116	119.6	5.392e-11	0.0006582	intron	splice_region
chr7:6016273:C:G	rs150718518	N	N	N	chr7	6016273	AIMP2	AIMP2	p22.1	C	G	8208	89.37	1.133e-09	0.001096	intron, near-gene-5	intron
chr7:17127714:A:G	rs75154303	N	N	N	chr7	17127714	LOC107986772	BRWD1P3	p21.1	A	G	8922	69.13	1.88e-09	0.001737	intron	intergenic
chr7:17144203:C:T	rs17137273	N	N	N	chr7	17144203	LOC107986772, LOC101927609	BRWD1P3	p21.1	C	T	9143	147	1.564e-13	0.0005469	intron	intergenic
chr7:38214453:T:C	rs188786122	N	N	N	chr7	38214453	STARD3NL	STARD3NL	p14.1	T	C	7292	131.1	1.014e-10	0.0006857	intron	intron
chr7:45626305:C:G	rs116918481	N	N	N	chr7	45626305	ADCY1	ADCY1	p12.3	C	G	9141	104.6	5.046e-11	0.0008752	intron	intron
chr7:73626484:T:G	rs34121855	Y	N	N	chr7	73626484	MLXIPL	MLXIPL	q11.23	T	G	8809	-7.104	8.439e-09	0.175	near-gene-5	NA
chr7:73626484:T:G	rs368840056	N	N	N	chr7	73626484	NA	NA	q11.23	T	G	8809	-7.104	8.439e-09	0.175	near-gene-5	NA
chr7:141566086:T:C	rs112710413	N	N	N	chr7	141566086	AGK	AGK	q34	T	C	9183	98.12	5.29e-09	0.0007623	intron	intron
chr7:141569829:C:T	rs113873543	N	N	N	chr7	141569829	AGK	AGK	q34	C	T	9182	98.12	5.301e-09	0.0007624	intron	intron
chr7:141579847:T:C	rs111228196	N	N	N	chr7	141579847	AGK	AGK	q34	T	C	9182	102.6	4.027e-09	0.0007079	intron	intron
chr7:141587792:T:C	rs113332866	N	N	N	chr7	141587792	AGK	AGK	q34	T	C	9183	98.12	5.29e-09	0.0007623	intron	intron
chr7:154531647:T:C	rs144522805	N	N	N	chr7	154531647	DPP6	DPP6	q36.2	T	C	9026	107.2	2.513e-10	0.0007755	intron	intron
chr7:154535184:G:A	rs147533847	N	N	N	chr7	154535184	DPP6	DPP6	q36.2	G	A	9011	107.1	2.669e-10	0.0007768	intron	intron
chr7:154542423:A:C	rs114272295	N	N	N	chr7	154542423	DPP6, LOC112267989	DPP6	q36.2	A	C	9030	104.5	6.936e-10	0.0007752	intron	intron
chr7:154544990:C:T	rs149782537	N	N	N	chr7	154544990	DPP6, LOC112267989	DPP6	q36.2	C	T	9046	104.5	6.857e-10	0.0007738	intron	intron
chr7:154546430:A:G	rs11980465	N	N	N	chr7	154546430	DPP6, LOC112267989	DPP6	q36.2	A	G	9044	104.5	6.983e-10	0.000774	intron	intron
chr7:154548549:G:C	rs115960183	N	N	N	chr7	154548549	DPP6, LOC112267989	DPP6	q36.2	G	C	9001	118	1.098e-10	0.0006666	intron	intron
chr7:154552240:T:C	rs118001071	N	N	N	chr7	154552240	DPP6, LOC112267989	DPP6	q36.2	T	C	9049	104.5	6.835e-10	0.0007736	intron	intron
chr7:154554187:G:T	rs117931996	N	N	N	chr7	154554187	DPP6, LOC112267989	NA	q36.2	G	T	9069	117	2.793e-11	0.0007167	intron	NA
chr7:154555543:C:T	rs184114729	N	N	N	chr7	154555543	DPP6	DPP6	q36.2	C	T	9064	104.6	6.518e-10	0.0007723	intron	intron
chr8:10390103:C:T	rs35087026	N	N	N	chr8	10390103	MSRA	MSRA	p23.1	C	T	7175	121.3	1.059e-09	0.0006969	intron	intron
chr8:17216852:G:A	rs78335702	N	N	N	chr8	17216852	ZDHHC2	ZDHHC2	p22	G	A	9106	105.7	6.622e-09	0.0006589	intron	intron
chr8:17376381:A:G	rs10435696	N	N	N	chr8	17376381	MTMR7, LOC102724838	MTMR7	p22	A	G	9160	133.1	2.328e-11	0.0005459	intron	intron
chr8:19961262:G:T	rs767508715	N	N	N	chr8	19961262	LPL	NA	p21.3	G	T	5962	-12.02	2.33e-10	0.1035	intron	NA
chr8:19961262:G:T	rs917149995	N	N	N	chr8	19961262	LPL	NA	p21.3	G	T	5962	-12.02	2.33e-10	0.1035	intron	NA
chr8:19961262:G:T	rs117026536	Y	N	N	chr8	19961262	LPL	LPL	p21.3	G	T	5962	-12.02	2.33e-10	0.1035	intron	intron
chr8:19961817:T:C	rs325	Y	N	Y	chr8	19961817	LPL	LPL	p21.3	T	C	9183	-10.03	5.467e-11	0.1027	intron	intron
chr8:19962213:C:G	rs328	Y	N	Y	chr8	19962213	LPL	LPL	p21.3	C	G	9183	-10.05	5.272e-11	0.1025	nonsense	stop_gained
chr8:19962922:T:C	rs12679834	Y	N	N	chr8	19962922	LPL	LPL	p21.3	T	C	9079	-9.879	2.503e-10	0.1003	intron	intron
chr8:19963405:C:T	rs117199990	Y	N	N	chr8	19963405	LPL	LPL	p21.3	C	T	9053	-10.15	1.004e-10	0.09709	intron	intron
chr8:19963422:A:C	rs145391587	Y	N	N	chr8	19963422	LPL	LPL	p21.3	A	C	9063	-10.18	7.625e-11	0.09754	intron	intron
chr8:19963914:T:G	rs75278536	Y	N	N	chr8	19963914	LPL	LPL	p21.3	T	G	9117	-9.4	5.392e-10	0.1052	intron	intron
chr8:19963956:GT:G	rs28716400	N	N	N	chr8	19963956	LPL	LPL	p21.3	GT	G	9121	-9.737	1.375e-10	0.1048	intron	intron
chr8:19963956:GT:G	rs1274451385	N	N	N	chr8	19963956	LPL	NA	p21.3	GT	G	9121	-9.737	1.375e-10	0.1048	intron	NA
chr8:19964271:T:G	rs77069344	Y	N	N	chr8	19964271	LPL	LPL	p21.3	T	G	9076	-9.618	2.886e-10	0.1035	intron	intron
chr8:19965299:C:T	rs11570891	Y	N	Y	chr8	19965299	LPL	LPL	p21.3	C	T	9164	-9.491	2.352e-10	0.1081	intron	intron
chr8:19965299:C:T	rs1325720759	N	N	N	chr8	19965299	LPL	NA	p21.3	C	T	9164	-9.491	2.352e-10	0.1081	intron	NA
chr8:19966163:C:T	rs1803924	Y	N	N	chr8	19966163	LPL	LPL	p21.3	C	T	9124	-9.55	2.747e-10	0.1054	untranslated-3	3_prime_UTR
chr8:19966534:C:A	rs3735964	Y	N	N	chr8	19966534	LPL	LPL	p21.3	C	A	9125	-9.468	3.894e-10	0.1055	untranslated-3	3_prime_UTR
chr8:19966981:T:C	rs13702	Y	N	Y	chr8	19966981	LPL	LPL	p21.3	T	C	9183	-5.861	7.79e-09	0.2921	untranslated-3	3_prime_UTR
chr8:19967052:T:C	rs1059611	Y	N	Y	chr8	19967052	LPL	LPL	p21.3	T	C	9183	-9.684	6.315e-11	0.1102	untranslated-3	3_prime_UTR
chr8:19967115:C:CTT	rs200877770	N	N	N	chr8	19967115	LPL	LPL	p21.3	C	CTT	9182	-9.675	6.666e-11	0.1102	untranslated-3	3_prime_UTR
chr8:19967115:C:CTT	rs10645926	N	N	N	chr8	19967115	LPL	LPL	p21.3	C	CTT	9182	-9.675	6.666e-11	0.1102	untranslated-3	indel
chr8:19969190:C:T	rs79108221	Y	N	Y	chr8	19969190	NA	LPL	p21.3	C	T	8965	-9.654	4.487e-10	0.099	unknown	downstream
chr8:19973410:C:T	rs10096633	Y	N	Y	chr8	19973410	NA	LPL	p21.3	C	T	9183	-8.056	3.296e-09	0.1344	unknown	intergenic
chr8:19975135:G:T	rs17482753	Y	N	Y	chr8	19975135	NA	LPL	p21.3	G	T	9183	-9.685	2.803e-10	0.1023	unknown	intergenic
chr8:19979135:T:C	rs78963197	Y	N	Y	chr8	19979135	NA	LPL	p21.3	T	C	9134	-9.851	3.185e-10	0.09853	unknown	intergenic
chr8:19979473:C:T	rs74855321	Y	N	N	chr8	19979473	NA	LPL	p21.3	C	T	9102	-9.786	5.565e-10	0.09712	unknown	intergenic
chr8:19982198:C:T	rs117779442	Y	N	N	chr8	19982198	NA	LPL	p21.3	C	T	8919	-11.3	2.034e-09	0.06553	unknown	intergenic
chr8:19982830:G:A	rs58946909	Y	N	N	chr8	19982830	NA	LPL	p21.3	G	A	9088	-9.719	5.56e-10	0.09843	unknown	intergenic
chr8:19982897:G:C	rs75551077	Y	N	Y	chr8	19982897	NA	LPL	p21.3	G	C	9102	-9.974	2.08e-10	0.09822	unknown	intergenic
chr8:19985257:C:G	rs113988682	N	N	N	chr8	19985257	NA	NA	p21.3	C	G	8874	-9.564	6.808e-09	0.0879	unknown	NA
chr8:19985951:C:A	rs17410914	Y	N	N	chr8	19985951	NA	LPL	p21.3	C	A	9093	-9.836	4.301e-10	0.09711	unknown	intergenic
chr8:19986068:G:C	rs75802599	N	N	N	chr8	19986068	NA	NA	p21.3	G	C	8967	-10.67	8.605e-11	0.08955	unknown	NA
chr8:19986350:G:A	rs117227752	Y	N	N	chr8	19986350	NA	LPL	p21.3	G	A	8815	-9.941	6.94e-09	0.08202	unknown	intergenic
chr8:19986711:A:G	rs12678919	Y	N	Y	chr8	19986711	NA	LPL	p21.3	A	G	9176	-9.599	7.846e-10	0.09901	unknown	intergenic
chr8:19988803:T:G	rs78458743	Y	N	N	chr8	19988803	NA	LPL	p21.3	T	G	8536	-9.786	7.735e-09	0.0854	unknown	intergenic
chr8:19988978:C:G	rs114566157	Y	N	N	chr8	19988978	NA	LPL	p21.3	C	G	8772	-10.56	7.556e-11	0.0908	unknown	intergenic
chr8:19988978:C:G	rs1446446348	N	N	N	chr8	19988978	NA	NA	p21.3	C	G	8772	-10.56	7.556e-11	0.0908	unknown	NA
chr8:19988978:C:G	rs1491152787	N	N	N	chr8	19988978	NA	NA	p21.3	C	G	8772	-10.56	7.556e-11	0.0908	unknown	NA
chr8:19989549:G:A	rs12682115	Y	N	N	chr8	19989549	NA	LPL	p21.3	G	A	9086	-9.495	1.939e-09	0.09641	unknown	intergenic
chr8:19989712:T:C	rs78013771	Y	N	N	chr8	19989712	NA	LPL	p21.3	T	C	9087	-9.561	1.81e-09	0.09558	unknown	intergenic
chr8:19989930:C:A	rs76496571	Y	N	N	chr8	19989930	NA	LPL	p21.3	C	A	8584	-11.46	1.084e-11	0.08329	unknown	intergenic
chr8:19990179:C:A	rs10503669	Y	N	Y	chr8	19990179	NA	LPL	p21.3	C	A	9182	-9.645	6.475e-10	0.09889	unknown	intergenic
chr8:19991182:C:T	rs17410983	Y	N	N	chr8	19991182	NA	LPL	p21.3	C	T	9113	-10.24	5.008e-11	0.09783	unknown	intergenic
chr8:19991367:A:T	rs17489226	Y	N	N	chr8	19991367	NA	LPL	p21.3	A	T	9132	-9.569	1.038e-09	0.09845	unknown	intergenic
chr8:19991761:T:G	rs17410996	Y	N	N	chr8	19991761	NA	LPL	p21.3	T	G	9117	-9.703	8.064e-10	0.09685	unknown	intergenic
chr8:19992478:A:G	rs114964604	Y	N	N	chr8	19992478	NA	LPL	p21.3	A	G	8984	-9.604	1.133e-09	0.09945	unknown	intergenic
chr8:19992588:T:G	rs79407615	N	N	N	chr8	19992588	NA	NA	p21.3	T	G	9069	-9.855	5.843e-10	0.09466	unknown	NA
chr8:19993997:C:A	rs76975037	Y	N	N	chr8	19993997	NA	LPL	p21.3	C	A	8640	-10.26	7.287e-10	0.08449	unknown	intergenic
chr8:19997495:C:G	rs17411113	Y	N	N	chr8	19997495	NA	LPL	p21.3	C	G	9141	-9.486	7.942e-10	0.1013	unknown	intergenic
chr8:20002949:C:G	rs79236614	Y	N	Y	chr8	20002949	NA	LPL	p21.3	C	G	8954	-9.831	3.708e-10	0.1006	unknown	intergenic
chr8:20005847:T:C	rs6586884	Y	N	N	chr8	20005847	NA	LPL	p21.3	T	C	9110	-9.631	6.909e-10	0.09852	unknown	intergenic
chr8:20005960:T:A	rs6999813	Y	N	N	chr8	20005960	NA	LPL	p21.3	T	A	9122	-10.04	8.799e-11	0.09905	unknown	intergenic
chr8:20007176:G:A	rs1441762	Y	N	N	chr8	20007176	NA	LPL	p21.3	G	A	9059	-6.043	7.35e-09	0.2577	unknown	intergenic
chr8:20009367:A:T	rs1441758	Y	N	N	chr8	20009367	NA	LPL	p21.3	A	T	9012	-6.123	5.659e-09	0.2541	unknown	intergenic
chr8:20011553:G:A	rs1441753	Y	N	N	chr8	20011553	NA	LPL	p21.3	G	A	9055	-6.143	4.7e-09	0.2553	unknown	intergenic
chr8:20012165:G:A	rs1919484	Y	N	Y	chr8	20012165	NA	LPL	p21.3	G	A	9076	-6.065	8.346e-09	0.2559	unknown	intergenic
chr8:20013602:C:T	rs78810414	Y	N	N	chr8	20013602	NA	LPL	p21.3	C	T	9082	-9.638	9.55e-10	0.09662	unknown	intergenic
chr8:20017421:AAGAC:A	rs141287949	N	N	N	chr8	20017421	NA	NA	p21.3	AAGAC	A	9088	-9.573	1.039e-09	0.09799	unknown	NA
chr8:20018723:A:T	rs28675909	Y	N	N	chr8	20018723	NA	LPL	p21.3	A	T	9092	-9.403	1.685e-09	0.09926	unknown	intergenic
chr8:20018753:C:T	rs79198716	Y	N	N	chr8	20018753	NA	LPL	p21.3	C	T	9119	-9.33	2.323e-09	0.09913	unknown	intergenic
chr8:20019235:G:C	rs7016880	Y	N	Y	chr8	20019235	NA	LPL	p21.3	G	C	9163	-9.768	2.3e-10	0.1018	unknown	intergenic
chr8:20019950:T:C	rs77219697	Y	N	N	chr8	20019950	NA	LPL	p21.3	T	C	9088	-9.74	6.11e-10	0.09771	unknown	intergenic
chr8:20020221:C:T	rs12678603	Y	N	N	chr8	20020221	NA	LPL	p21.3	C	T	9071	-9.762	4.238e-10	0.09878	unknown	intergenic
chr8:20020262:C:G	rs12678604	Y	N	N	chr8	20020262	NA	LPL	p21.3	C	G	9105	-9.425	1.742e-09	0.09852	unknown	intergenic
chr8:20021193:T:A	rs112994260	Y	N	N	chr8	20021193	NA	LPL	p21.3	T	A	9089	-9.356	2.415e-09	0.09814	unknown	intergenic
chr8:20021359:C:A	rs142117848	Y	N	N	chr8	20021359	NA	LPL	p21.3	C	A	9092	-9.719	6.4e-10	0.09767	unknown	intergenic
chr8:20022298:G:A	rs75082673	Y	N	N	chr8	20022298	NA	LPL	p21.3	G	A	9095	-9.152	5.505e-09	0.09797	unknown	intergenic
chr8:20022819:C:T	rs11989309	Y	N	N	chr8	20022819	NA	LPL	p21.3	C	T	9086	-9.371	2.461e-09	0.09773	unknown	intergenic
chr8:20023215:C:T	rs75675187	Y	N	N	chr8	20023215	NA	LPL	p21.3	C	T	9084	-9.432	1.906e-09	0.09781	unknown	intergenic
chr8:20023529:G:A	rs74511360	Y	N	N	chr8	20023529	NA	AC100802.3	p21.3	G	A	9096	-9.403	1.866e-09	0.09845	unknown	intergenic
chr8:20023547:A:G	rs78404258	Y	N	N	chr8	20023547	NA	AC100802.3	p21.3	A	G	9045	-9.611	1.125e-09	0.09652	unknown	intergenic
chr8:20023725:G:A	rs74615535	Y	N	N	chr8	20023725	NA	AC100802.3	p21.3	G	A	8971	-9.627	2.281e-09	0.0928	unknown	intergenic
chr8:20024290:A:G	rs60223219	Y	N	N	chr8	20024290	NA	AC100802.3	p21.3	A	G	9031	-9.572	7.238e-10	0.09905	unknown	intergenic
chr8:20025439:T:C	rs7816447	Y	N	N	chr8	20025439	NA	AC100802.3	p21.3	T	C	9092	-9.758	2.58e-10	0.1005	unknown	intergenic
chr8:20026746:G:A	rs114650503	Y	N	N	chr8	20026746	NA	AC100802.3	p21.3	G	A	9003	-9.788	7.656e-10	0.09502	unknown	intergenic
chr8:20027436:C:G	rs9644639	Y	N	N	chr8	20027436	NA	AC100802.3	p21.3	C	G	9080	-9.328	2.784e-09	0.09802	unknown	intergenic
chr8:20028215:T:C	rs11984636	Y	N	Y	chr8	20028215	NA	AC100802.3	p21.3	T	C	9012	-9.49	2.303e-09	0.09548	unknown	intergenic
chr8:20028423:T:C	rs11984698	Y	N	N	chr8	20028423	NA	AC100802.3	p21.3	T	C	9087	-9.513	1.181e-09	0.09871	unknown	intergenic
chr8:20029177:C:T	rs11995475	Y	N	N	chr8	20029177	NA	AC100802.3	p21.3	C	T	9036	-9.158	6.036e-09	0.09794	unknown	intergenic
chr8:20029651:A:T	rs75469215	Y	N	N	chr8	20029651	NA	AC100802.3	p21.3	A	T	9085	-9.765	3.374e-10	0.1003	unknown	intergenic
chr8:20035786:A:G	rs139315015	Y	N	N	chr8	20035786	NA	AC100802.3	p21.3	A	G	8961	-9.522	1.123e-09	0.09915	unknown	intergenic
chr8:20045407:A:G	rs6993414	Y	N	N	chr8	20045407	NA	AC100802.3	p21.3	A	G	9065	-9.739	2.222e-10	0.1028	unknown	intergenic
chr8:20045739:G:A	rs74983646	Y	N	N	chr8	20045739	NA	AC100802.3	p21.3	G	A	9073	-9.484	6.121e-10	0.1029	unknown	intergenic
chr8:20050401:T:C	rs11991231	Y	N	N	chr8	20050401	NA	AC100802.3	p21.3	T	C	8915	-9.342	1.112e-09	0.1053	unknown	intergenic
chr8:20062144:C:T	rs4128744	Y	N	T	chr8	20062144	NA	AC100802.3	p21.3	C	T	8844	-8.613	1.373e-09	0.1244	unknown	intergenic
chr8:20071071:G:A	rs9644568	Y	N	Y	chr8	20071071	NA	AC100802.3	p21.3	G	A	9181	-8.275	1.64e-09	0.1308	unknown	intergenic
chr8:83794809:G:A	rs114254836	N	N	N	chr8	83794809	NA	RP11NA120I21.2	q21.2	G	A	9173	109.9	1.468e-09	0.0006541	unknown	intergenic
chr8:83794839:C:CA	rs200834327	N	N	N	chr8	83794839	NA	RP11NA120I21.2	q21.2	C	CA	9174	109.9	1.467e-09	0.000654	unknown	indel
chr8:83795706:T:C	rs28825091	N	N	N	chr8	83795706	NA	RP11NA120I21.2	q21.2	T	C	9174	109.9	1.467e-09	0.000654	unknown	intergenic
chr8:83796659:T:C	rs75878792	N	N	N	chr8	83796659	NA	RP11NA120I21.2	q21.2	T	C	9174	109.9	1.467e-09	0.000654	unknown	intergenic
chr8:83796809:G:A	rs115246148	N	N	N	chr8	83796809	NA	RP11NA120I21.2	q21.2	G	A	9173	114.3	1.749e-09	0.0005996	unknown	intergenic
chr8:83797063:G:T	rs28892436	N	N	N	chr8	83797063	NA	RP11NA120I21.2	q21.2	G	T	9172	135.3	1.09e-11	0.0005451	unknown	intergenic
chr8:83797334:AAGTCCTTCCC:A	rs200631426	N	N	N	chr8	83797334	NA	NA	q21.2	AAGTCCTTCCC	A	9152	110	1.474e-09	0.0006556	unknown	NA
chr8:83797666:G:C	rs116485130	N	N	N	chr8	83797666	NA	RP11NA120I21.2	q21.2	G	C	9174	109.9	1.467e-09	0.000654	unknown	intergenic
chr8:83797802:A:C	rs116095279	N	N	N	chr8	83797802	NA	RP11NA120I21.2	q21.2	A	C	9174	109.9	1.467e-09	0.000654	unknown	intergenic
chr8:83798006:G:A	rs114499640	N	N	N	chr8	83798006	NA	RP11NA120I21.2	q21.2	G	A	9173	118.6	4.241e-10	0.0005996	unknown	intergenic
chr8:83803174:G:A	rs116174057	N	N	N	chr8	83803174	NA	RP11NA120I21.2	q21.2	G	A	9174	118.5	4.266e-10	0.0005995	unknown	intergenic
chr8:125465736:G:C	rs2001945	Y	N	Y	chr8	125465736	NA	RP11NA136O12.2	q24.13	G	G	9182	5.57	2.447e-09	0.4831	unknown	upstream
chr8:125467073:G:A	rs6982636	Y	N	N	chr8	125467073	NA	RP11NA136O12.2	q24.13	G	A	9175	-5.45	5.13e-09	0.4624	unknown	intron
chr8:125467120:C:T	rs6982502	Y	N	Y	chr8	125467120	NA	RP11NA136O12.2	q24.13	C	C	9035	5.62	2.475e-09	0.4835	unknown	intron
chr8:125470379:C:A	rs2954022	Y	N	Y	chr8	125470379	NA	RP11NA136O12.2	q24.13	C	A	8982	-5.564	3.158e-09	0.4587	unknown	intron
chr8:125473052:T:A	rs2954027	Y	N	N	chr8	125473052	NA	RP11NA136O12.2	q24.13	T	A	9049	-5.543	2.345e-09	0.4626	unknown	intron
chr8:125474167:A:G	rs17321515	Y	N	Y	chr8	125474167	NA	RP11NA136O12.2	q24.13	A	G	9155	-5.596	2.118e-09	0.4667	unknown	intron
chr9:27813613:A:G	rs10968126	N	N	N	chr9	27813613	NA	RP11NA575I8.1	p21.2	A	G	9177	66.37	2.48e-09	0.001689	unknown	intergenic
chr9:27817612:A:T	rs79856578	N	N	N	chr9	27817612	NA	RP11NA575I8.1	p21.2	A	T	9180	63.62	4.102e-09	0.001797	unknown	intergenic
chr9:27848451:G:C	rs10968148	N	N	N	chr9	27848451	NA	RP11NA575I8.1	p21.2	G	C	8997	83.07	1.371e-09	0.001167	unknown	downstream
chr9:27849556:G:T	rs73433783	N	N	N	chr9	27849556	NA	NA	p21.2	G	T	9137	99.28	2.484e-11	0.000985	unknown	NA
chr9:68802971:T:C	rs60824041	N	N	N	chr9	68802971	PIP5K1B	PIP5K1B	q21.11	T	C	8784	107.3	1.069e-11	0.0007969	intron	intron
chr9:130466697:C:T	rs76169404	N	N	N	chr9	130466697	ASS1	ASS1	q34.11	C	T	9183	120.2	3.319e-11	0.0006534	intron	intron
chr10:6253597:A:G	rs189492838	N	N	N	chr10	6253597	PFKFB3	PFKFB3	p15.1	A	G	6595	98.67	3.78e-09	0.001061	intron	intron
chr10:24218181:T:TA	rs947056517	N	N	N	chr10	24218181	KIAA1217	NA	p12.2	T	TA	9163	120.7	1.55e-09	0.0005457	intron	NA
chr10:24218181:T:TA	rs199687671	N	N	N	chr10	24218181	KIAA1217	KIAA1217	p12.2	T	TA	9163	120.7	1.55e-09	0.0005457	intron	indel
chr10:121755533:G:A	rs7918609	N	N	N	chr10	121755533	ATE1	ATE1	q26.13	G	A	9155	109.4	2.005e-09	0.0006554	intron	intron
chr10:125667175:G:A	rs150204580	N	N	N	chr10	125667175	TEX36	TEX36	q26.13	G	A	6682	80.91	5.409e-09	0.001422	intron	intron
chr11:4589024:A:T	rs114881680	N	N	N	chr11	4589024	NA	OR52I1	p15.4	A	T	9173	113.3	4.318e-10	0.0006541	unknown	upstream
chr11:4660589:T:A	rs16926380	N	N	N	chr11	4660589	NA	OR51A9P	p15.4	T	A	9170	90.97	2.825e-10	0.001036	unknown	downstream
chr11:55811706:A:G	rs139708815	N	N	N	chr11	55811706	OR5L1	OR5L1	q12.1	A	G	8830	122.8	1.614e-11	0.0006795	coding-synon, missense	synonymous
chr11:93478570:T:C	rs116878867	N	N	N	chr11	93478570	SMCO4	SMCO4	q21	T	C	9090	117.2	1.012e-09	0.0006051	untranslated-3	3_prime_UTR
chr11:101341037:C:T	rs75184648	N	N	N	chr11	101341037	LOC105369458	TRPC6	q22.1	C	T	9031	123.6	1.144e-11	0.0006644	intron, ncRNA	intergenic
chr11:105023036:C:G	rs543413529	N	N	N	chr11	105023036	CASP5	CASP5	q22.3	C	G	8264	138.2	6.527e-12	0.000605	intron	intron
chr11:114070988:C:T	rs111244182	N	N	N	chr11	114070988	ZBTB16	ZBTB16	q23.2	C	T	8202	116.3	2.37e-09	0.0006096	intron	intron
chr11:116656804:T:C	rs55776558	N	N	N	chr11	116656804	LOC101929011, LINC02702	AP000770.1	q23.3	T	C	8935	16.75	1.856e-10	0.03229	intron	intron
chr11:116657827:C:T	rs74444640	Y	N	N	chr11	116657827	LOC101929011, LINC02702	AP000770.1	q23.3	C	T	8867	16.89	8.309e-12	0.03761	intron	intron
chr11:116658596:G:A	rs61906078	Y	N	N	chr11	116658596	NA	AP000770.1	q23.3	G	A	8034	16.82	9.706e-10	0.02956	near-gene-3	downstream
chr11:116660762:T:A	rs17119878	Y	N	N	chr11	116660762	NA	AP000770.1	q23.3	T	A	8864	14.51	1.977e-09	0.03875	unknown	downstream
chr11:116662943:C:G	rs61906079	Y	N	N	chr11	116662943	NA	AP000770.1	q23.3	C	G	9026	16.4	9.88e-12	0.03894	unknown	downstream
chr11:116664986:C:T	rs56289161	Y	N	N	chr11	116664986	NA	AP000770.1	q23.3	C	T	9035	16.96	1.779e-12	0.03913	unknown	intergenic
chr11:116667163:C:A	rs61209319	N	N	N	chr11	116667163	NA	AP000770.1	q23.3	C	A	9001	17.11	2.604e-12	0.03772	unknown	intergenic
chr11:116668308:C:G	rs61906084	N	N	N	chr11	116668308	NA	AP000770.1	q23.3	C	G	9037	16.71	3.083e-12	0.03939	unknown	intergenic
chr11:116668373:A:G	rs61906085	N	N	N	chr11	116668373	NA	AP000770.1	q23.3	A	G	9035	18.16	4.485e-13	0.03564	unknown	intergenic
chr11:116668920:A:G	rs61906086	N	N	N	chr11	116668920	NA	AP000770.1	q23.3	A	G	9029	16.98	1.969e-12	0.03893	unknown	intergenic
chr11:116669593:C:T	rs56060233	N	N	N	chr11	116669593	NA	AP000770.1	q23.3	C	T	9054	16.24	4.076e-11	0.03656	unknown	intergenic
chr11:116670068:G:C	rs58208536	N	N	N	chr11	116670068	NA	AP000770.1	q23.3	G	C	9019	15.88	5.441e-11	0.03836	unknown	intergenic
chr11:116670199:C:T	rs58346469	N	N	N	chr11	116670199	NA	AP000770.1	q23.3	C	T	9022	16.7	5.255e-12	0.03857	unknown	intergenic
chr11:116670551:G:A	rs56196414	N	N	N	chr11	116670551	NA	AP000770.1	q23.3	G	A	8997	16.43	2.32e-11	0.0374	unknown	intergenic
chr11:116670939:C:A	rs61906100	N	N	N	chr11	116670939	NA	AP000770.1	q23.3	C	A	8996	16.35	2.7e-11	0.03729	unknown	intergenic
chr11:116672381:T:C	rs58950690	N	N	N	chr11	116672381	NA	AP000770.1	q23.3	T	C	9004	16.73	8.184e-12	0.03759	unknown	intergenic
chr11:116673618:C:T	rs1388159601	N	N	N	chr11	116673618	NA	NA	q23.3	C	T	8977	15.27	2.425e-09	0.03459	unknown	NA
chr11:116673618:C:T	rs573100887	N	N	N	chr11	116673618	NA	AP000770.1	q23.3	C	T	8977	15.27	2.425e-09	0.03459	unknown	intergenic
chr11:116673618:C:T	rs374645176	N	N	N	chr11	116673618	NA	NA	q23.3	C	T	8977	15.27	2.425e-09	0.03459	unknown	NA
chr11:116673624:TTA:T	rs1487339831	N	N	N	chr11	116673624	NA	NA	q23.3	TTA	T	9049	16.6	4.491e-12	0.03923	unknown	NA
chr11:116673624:TTA:T	rs1265300708	N	N	N	chr11	116673624	NA	NA	q23.3	TTA	T	9049	16.6	4.491e-12	0.03923	unknown	NA
chr11:116674091:T:C	rs190529145	N	N	N	chr11	116674091	NA	AP000770.1	q23.3	T	C	8971	17.15	1.735e-10	0.0316	unknown	intergenic
chr11:116675444:A:T	rs80068772	N	N	N	chr11	116675444	NA	AP000770.1	q23.3	A	T	9048	17.15	5.696e-13	0.0399	unknown	intergenic
chr11:116676287:T:G	rs61906103	N	N	N	chr11	116676287	NA	AP000770.1	q23.3	T	G	8985	16.12	7.101e-12	0.04107	unknown	intergenic
chr11:116679811:A:G	rs61906105	Y	N	N	chr11	116679811	NA	AP000770.1	q23.3	A	G	9036	16.47	4.846e-12	0.03929	unknown	intergenic
chr11:116679831:C:A	rs61906106	Y	N	N	chr11	116679831	NA	AP000770.1	q23.3	C	A	9042	16.46	5.973e-12	0.03948	unknown	intergenic
chr11:116681345:A:T	rs61906107	Y	N	N	chr11	116681345	NA	AP000770.1	q23.3	A	T	9042	16.89	1.65e-12	0.03948	unknown	intergenic
chr11:116681845:C:T	rs7952043	Y	N	N	chr11	116681845	NA	AP000770.1	q23.3	C	T	9053	16.37	5.437e-12	0.03999	unknown	intergenic
chr11:116683512:C:A	rs61906109	Y	N	N	chr11	116683512	NA	AP000770.1	q23.3	C	A	9046	16.52	4.539e-12	0.03963	unknown	intergenic
chr11:116686196:C:T	rs61906113	Y	N	N	chr11	116686196	NA	AP000770.1	q23.3	C	T	9011	15.16	4.238e-10	0.03806	unknown	intergenic
chr11:116686328:G:C	rs61906114	N	N	N	chr11	116686328	NA	AP000770.1	q23.3	G	C	8930	17.36	1.763e-12	0.03735	unknown	intergenic
chr11:116688066:G:A	rs12800424	Y	N	N	chr11	116688066	NA	AP000770.1	q23.3	G	A	8949	15.18	2.262e-10	0.0381	unknown	intergenic
chr11:116688112:G:A	rs56182713	N	N	N	chr11	116688112	NA	AP000770.1	q23.3	G	A	8910	17.24	3.188e-12	0.03614	unknown	intergenic
chr11:116688837:G:T	rs11824135	Y	N	N	chr11	116688837	NA	AP000770.1	q23.3	G	T	8783	12.95	5.056e-12	0.06655	unknown	intergenic
chr11:116690912:G:A	rs61905060	N	N	N	chr11	116690912	NA	AP000770.1	q23.3	G	A	9059	16.01	2.094e-11	0.03814	unknown	intergenic
chr11:116700892:A:G	rs61905066	N	N	N	chr11	116700892	NA	NA	q23.3	A	G	8723	13.83	7.719e-13	0.06156	unknown	NA
chr11:116701373:C:T	rs1892948	N	N	N	chr11	116701373	NA	NA	q23.3	C	T	8743	14.52	4.4e-14	0.06239	unknown	NA
chr11:116706868:CA:C	rs1443761924	N	N	N	chr11	116706868	NA	NA	q23.3	CA	C	8812	14.66	1.926e-10	0.04187	unknown	NA
chr11:116706868:CA:C	rs1395986044	N	N	N	chr11	116706868	NA	NA	q23.3	CA	C	8812	14.66	1.926e-10	0.04187	unknown	NA
chr11:116710543:C:T	rs61905072	Y	N	N	chr11	116710543	NA	BUD13	q23.3	C	T	8970	18.57	1.311e-18	0.05134	unknown	intergenic
chr11:116712969:G:A	rs74849419	Y	N	N	chr11	116712969	NA	BUD13	q23.3	G	A	8899	17.14	7.474e-16	0.04781	unknown	intergenic
chr11:116714271:C:T	rs4938303	Y	N	Y	chr11	116714271	NA	BUD13	q23.3	C	C	8264	8.964	2.896e-17	0.2849	unknown	intergenic
chr11:116715567:T:C	rs7350481	Y	N	Y	chr11	116715567	NA	BUD13	q23.3	T	T	8388	13.29	1.324e-12	0.07594	unknown	intergenic
chr11:116720071:G:A	rs6589563	Y	N	N	chr11	116720071	NA	BUD13	q23.3	G	A	9004	15.67	5.158e-20	0.0778	unknown	intergenic
chr11:116720071:G:A	rs377334637	N	N	N	chr11	116720071	NA	NA	q23.3	G	A	9004	15.67	5.158e-20	0.0778	unknown	NA
chr11:116725413:C:A	rs11216117	Y	N	N	chr11	116725413	NA	BUD13	q23.3	C	A	9083	17.46	3.838e-22	0.06986	unknown	intergenic
chr11:116725748:G:A	rs60583202	Y	N	N	chr11	116725748	NA	BUD13	q23.3	G	A	9066	17.51	5.406e-22	0.0691	unknown	intergenic
chr11:116729684:A:G	rs12279373	N	N	N	chr11	116729684	NA	NA	q23.3	A	G	9065	18.15	1.57e-23	0.06911	unknown	NA
chr11:116729848:G:A	rs61905081	Y	N	N	chr11	116729848	NA	BUD13	q23.3	G	A	9061	18.91	2.919e-25	0.06859	unknown	intergenic
chr11:116733008:C:A	rs12272004	Y	N	Y	chr11	116733008	NA	BUD13	q23.3	C	A	9140	18.73	7.258e-26	0.07369	unknown	intergenic
chr11:116734354:C:T	rs12274046	Y	N	N	chr11	116734354	NA	BUD13	q23.3	C	T	9053	17.8	1.798e-21	0.0655	unknown	intergenic
chr11:116734360:G:A	rs12274146	Y	N	N	chr11	116734360	NA	BUD13	q23.3	G	A	9055	17.77	2.167e-21	0.06488	unknown	intergenic
chr11:116736050:G:A	rs1974718	Y	N	N	chr11	116736050	NA	BUD13	q23.3	G	G	9035	15.76	9.371e-19	0.07216	unknown	intergenic
chr11:116736721:C:T	rs1558861	Y	N	Y	chr11	116736721	NA	BUD13	q23.3	C	C	9181	16.17	9.575e-21	0.07782	unknown	intergenic
chr11:116737158:A:T	rs59455853	Y	N	N	chr11	116737158	NA	BUD13	q23.3	A	T	9065	19.28	1.028e-24	0.06586	unknown	intergenic
chr11:116739533:A:G	rs10466588	Y	N	N	chr11	116739533	NA	BUD13	q23.3	A	G	9028	16.6	2.96e-22	0.08136	unknown	intergenic
chr11:116740741:C:T	rs57232565	Y	N	N	chr11	116740741	NA	BUD13	q23.3	C	T	8641	14.03	2.305e-09	0.04016	unknown	intergenic
chr11:116741017:C:G	rs9326246	Y	N	N	chr11	116741017	NA	BUD13	q23.3	C	C	9182	16.13	1.258e-20	0.07782	unknown	intergenic
chr11:116742944:C:T	rs12280753	Y	N	Y	chr11	116742944	NA	BUD13	q23.3	C	T	9110	17.14	6.503e-23	0.07805	unknown	intergenic
chr11:116744147:T:C	rs61905086	Y	N	N	chr11	116744147	NA	BUD13	q23.3	T	C	9091	19.04	2.011e-25	0.07034	unknown	downstream
chr11:116748357:C:G	rs28927680	Y	N	Y	chr11	116748357	BUD13	BUD13	q23.3	C	G	9183	19.08	1.048e-25	0.07029	untranslated-3	3_prime_UTR
chr11:116749151:C:A	rs61905088	Y	N	N	chr11	116749151	BUD13	BUD13	q23.3	C	A	9057	18.39	3.701e-23	0.06774	intron	intron
chr11:116752006:C:T	rs55713675	Y	N	N	chr11	116752006	BUD13	BUD13	q23.3	C	T	8971	17.82	2.659e-21	0.06582	intron	intron
chr11:116752497:TA:T	rs1223100496	N	N	N	chr11	116752497	BUD13	NA	q23.3	TA	TA	9109	17.88	3.871e-45	0.1598	intron	NA
chr11:116752958:C:T	rs57200947	Y	N	N	chr11	116752958	BUD13	BUD13	q23.3	C	T	9034	19.09	9.521e-24	0.06404	intron	intron
chr11:116753885:C:A	rs61905108	Y	N	N	chr11	116753885	BUD13	BUD13	q23.3	C	A	9071	19.04	1.734e-15	0.03831	intron	intron
chr11:116753987:G:T	rs180326	Y	N	Y	chr11	116753987	BUD13	BUD13	q23.3	G	G	7379	8.758	1.126e-17	0.3639	intron	intron
chr11:116754011:C:G	rs7930786	Y	N	N	chr11	116754011	BUD13	BUD13	q23.3	C	C	7442	16.95	4.572e-20	0.078	intron	intron
chr11:116754646:G:A	rs56225305	Y	N	N	chr11	116754646	BUD13	BUD13	q23.3	G	A	9104	19.01	1.161e-24	0.06744	intron	intron
chr11:116755542:G:A	rs11825181	Y	N	Y	chr11	116755542	BUD13	BUD13	q23.3	G	A	9095	19.74	8.364e-27	0.06982	intron	intron
chr11:116756340:G:A	rs56143464	Y	N	N	chr11	116756340	BUD13	BUD13	q23.3	G	A	9054	19.04	1.309e-24	0.06765	intron	intron
chr11:116756381:G:A	rs56224630	Y	N	N	chr11	116756381	BUD13	BUD13	q23.3	G	A	9029	19.49	1.289e-24	0.06396	intron	intron
chr11:116759018:T:TAA	rs1266020203	N	N	N	chr11	116759018	BUD13	NA	q23.3	T	TAA	8795	17.91	7.628e-19	0.05657	intron	NA
chr11:116759018:T:TAA	rs71833854	N	N	N	chr11	116759018	BUD13	NA	q23.3	T	TAA	8795	17.91	7.628e-19	0.05657	intron	NA
chr11:116761784:C:T	rs10488699	Y	N	N	chr11	116761784	BUD13	BUD13	q23.3	C	T	9131	19.85	8.323e-27	0.0679	intron	intron
chr11:116762240:C:T	rs57641217	Y	N	N	chr11	116762240	BUD13	BUD13	q23.3	C	T	9068	18.87	1.879e-24	0.06788	intron	intron
chr11:116763146:G:A	rs11820589	Y	N	N	chr11	116763146	BUD13	BUD13	q23.3	G	A	9118	19.59	1.933e-26	0.06893	missense	missense
chr11:116764897:C:A	rs60972755	Y	N	N	chr11	116764897	BUD13	BUD13	q23.3	C	A	9083	19.65	5.911e-26	0.06644	intron	intron
chr11:116766430:C:T	rs12294259	Y	N	N	chr11	116766430	BUD13	BUD13	q23.3	C	T	8471	22.09	1.282e-29	0.06528	intron	intron
chr11:116768388:A:G	rs10790162	Y	N	Y	chr11	116768388	BUD13	BUD13	q23.3	A	A	7559	15.5	4.161e-17	0.08758	intron	intron
chr11:116769521:A:G	rs6589565	Y	N	N	chr11	116769521	BUD13	BUD13	q23.3	A	A	9105	16.37	1.98e-20	0.07435	intron	intron
chr11:116771421:C:T	rs664059	Y	N	N	chr11	116771421	BUD13	BUD13	q23.3	C	C	8918	5.608	1.727e-09	0.4835	intron	intron
chr11:116776891:C:T	rs2160669	Y	N	Y	chr11	116776891	ZPR1	ZPR1	q23.3	C	C	7726	15.35	1.773e-17	0.08795	unknown	3_prime_UTR
chr11:116778201:G:C	rs964184	Y	N	Y	chr11	116778201	ZPR1	ZPR1	q23.3	G	G	9180	19.19	8.358e-50	0.1485	near-gene-3, untranslated-3	3_prime_UTR
chr11:116778419:G:A	rs11823543	Y	N	Y	chr11	116778419	ZPR1	ZPR1	q23.3	G	A	8948	20.45	6.396e-29	0.07063	ncRNA, untranslated-3	3_prime_UTR
chr11:116779402:C:T	rs17120029	Y	N	N	chr11	116779402	ZPR1	ZPR1	q23.3	C	T	9122	20.06	1.284e-27	0.06802	intron	intron
chr11:116781491:C:T	rs12286037	Y	N	Y	chr11	116781491	ZPR1	ZPR1	q23.3	C	T	8995	19.89	1.09e-26	0.06815	intron	intron
chr11:116781635:A:G	rs12274192	Y	N	N	chr11	116781635	ZPR1	ZPR1	q23.3	A	G	7872	21.38	2.833e-26	0.06714	intron	intron
chr11:116781707:G:A	rs6589566	Y	N	Y	chr11	116781707	ZPR1	ZPR1	q23.3	G	G	8635	15.95	1.728e-19	0.07991	intron	intron
chr11:116781775:A:G	rs7483863	Y	N	N	chr11	116781775	ZPR1	ZPR1	q23.3	A	A	2048	23.09	2.018e-12	0.1064	intron	intron
chr11:116782580:C:T	rs2075290	Y	N	Y	chr11	116782580	ZPR1	ZPR1	q23.3	C	C	8771	15.49	2.753e-19	0.08334	intron	intron
chr11:116784884:G:A	rs35120633	Y	N	Y	chr11	116784884	ZPR1	ZPR1	q23.3	G	A	9183	20.9	5.505e-29	0.06583	ncRNA, missense	missense
chr11:116786845:C:T	rs3741298	Y	N	Y	chr11	116786845	ZPR1	ZPR1	q23.3	C	C	9171	12.67	4.537e-29	0.2162	intron	intron
chr11:116786874:C:CA	rs140050044	N	N	N	chr11	116786874	ZPR1	ZPR1	q23.3	C	CA	9181	20.58	6.329e-29	0.0678	intron	indel
chr11:116789970:G:A	rs2266788	Y	Y	Y	chr11	116789970	APOA5	APOA5	q23.3	G	G	9183	15.9	4.452e-20	0.07759	near-gene-5, untranslated-3	3_prime_UTR
chr11:116791110:T:C	rs2072560	Y	N	N	chr11	116791110	APOA5	APOA5	q23.3	T	T	9183	16.64	3.985e-20	0.06975	intron, near-gene-5	intron
chr11:116791615:G:T	rs12287066	Y	N	Y	chr11	116791615	APOA5	APOA5	q23.3	G	T	9183	20.58	6.362e-29	0.06779	coding-synon	synonymous
chr11:116791691:G:C	rs3135506	Y	Y	Y	chr11	116791691	APOA5	APOA5	q23.3	G	C	9183	20.97	2.425e-29	0.06615	missense	missense
chr11:116792991:G:A	rs662799	Y	N	Y	chr11	116792991	NA	ZPR1	q23.3	G	G	9176	16.19	1.656e-19	0.07149	near-gene-5	upstream
chr11:116830638:G:A	rs138326449	Y	N	N	chr11	116830638	APOC3	APOC3	q23.3	G	A	9183	-56.61	5.347e-09	0.002287	splice-5	splice_donor
chr11:116831407:T:C	rs386757819	Y	N	N	chr11	116831407	APOC3	APOC3	q23.3	T	T	9045	12.58	8.431e-16	0.09679	intron	indel
chr11:116831407:T:C	rs5141	N	N	N	chr11	116831407	APOC3	NA	q23.3	T	T	9045	12.58	8.431e-16	0.09679	intron	NA
chr11:116832924:G:C	rs5128	Y	N	N	chr11	116832924	APOC3	APOC3	q23.3	G	G	9183	12.56	2.08e-16	0.101	untranslated-3	3_prime_UTR
chr11:116834852:G:T	rs10750098	Y	N	N	chr11	116834852	NA	APOA1	q23.3	G	G	9018	12.34	7.562e-15	0.09337	near-gene-5	downstream
chr11:116836867:A:G	rs5072	Y	N	N	chr11	116836867	APOA1, APOA1-AS	APOA1	q23.3	A	A	7199	11.63	3.978e-10	0.08918	intron	intron
chr11:116836968:A:G	rs771350797	N	N	N	chr11	116836968	APOA1, APOA1-AS	NA	q23.3	A	A	9183	11.04	9.741e-12	0.08924	intron	NA
chr11:116836968:A:G	rs2070665	Y	N	N	chr11	116836968	APOA1, APOA1-AS	APOA1	q23.3	A	A	9183	11.04	9.741e-12	0.08924	intron	intron
chr11:116841899:G:A	rs184090774	N	N	N	chr11	116841899	APOA1-AS	APOA1	q23.3	G	A	9100	9.121	3.865e-10	0.1163	intron	upstream
chr11:116842862:ACCC:A	rs200408997	N	N	N	chr11	116842862	APOA1-AS	NA	q23.3	ACCC	A	8957	9.425	2.122e-10	0.1103	intron	NA
chr11:116844674:ATAT:A	rs201579941	N	N	N	chr11	116844674	APOA1-AS, SIK3	SIK3	q23.3	ATAT	A	9117	9.339	1.671e-10	0.1146	intron, cds-indel	indel
chr11:116853516:C:T	rs888246	Y	N	N	chr11	116853516	APOA1-AS, SIK3	SIK3	q23.3	C	T	9048	9.461	2.273e-10	0.1093	intron	intron
chr11:116859922:A:G	rs6589574	Y	N	N	chr11	116859922	SIK3	SIK3	q23.3	A	A	9024	10.62	1.044e-10	0.0886	intron	intron
chr11:116862600:T:C	rs2080586	Y	N	N	chr11	116862600	SIK3	SIK3	q23.3	T	C	8993	8.97	1.809e-09	0.1089	intron	intron
chr11:116880833:G:A	rs74341458	N	N	N	chr11	116880833	SIK3	SIK3	q23.3	G	A	9046	8.698	4.799e-09	0.1083	intron	intron
chr11:116888616:T:C	rs1473177	Y	N	N	chr11	116888616	SIK3	SIK3	q23.3	T	C	9094	8.683	3.684e-09	0.1119	intron	intron
chr11:116892113:G:A	rs75158858	N	N	N	chr11	116892113	SIK3	SIK3	q23.3	G	A	9080	8.773	5.212e-09	0.108	intron	intron
chr11:116914108:C:A	rs10892045	N	N	N	chr11	116914108	SIK3	SIK3	q23.3	C	A	9135	8.575	5.531e-09	0.1124	intron	NA
chr11:116914108:C:A	rs202181861	N	N	N	chr11	116914108	SIK3	NA	q23.3	C	A	9135	8.575	5.531e-09	0.1124	intron	NA
chr11:116914108:C:A	rs892685044	N	N	N	chr11	116914108	SIK3	NA	q23.3	C	A	9135	8.575	5.531e-09	0.1124	intron	NA
chr11:116916432:C:T	rs11216187	Y	N	N	chr11	116916432	SIK3	SIK3	q23.3	C	T	9078	8.554	7.772e-09	0.1102	intron	intron
chr11:116917775:C:T	rs76136280	N	N	N	chr11	116917775	SIK3	SIK3	q23.3	C	T	9122	8.883	1.676e-09	0.1134	intron	intron
chr11:116918472:T:A	rs79530380	N	N	N	chr11	116918472	SIK3	SIK3	q23.3	T	A	8649	9.846	6.491e-10	0.09966	intron	intron
chr11:116924163:G:A	rs117287138	N	N	N	chr11	116924163	SIK3	SIK3	q23.3	G	A	8961	8.933	3.263e-09	0.1042	intron	intron
chr11:116930485:A:C	rs645258	Y	N	N	chr11	116930485	SIK3	SIK3	q23.3	A	A	9110	10.27	1.136e-10	0.09402	intron	intron
chr11:116930813:C:G	rs76690043	N	N	N	chr11	116930813	SIK3	SIK3	q23.3	C	G	9121	8.909	2.492e-09	0.1083	intron	intron
chr11:116930813:C:G	rs1268880811	N	N	N	chr11	116930813	SIK3	NA	q23.3	C	G	9121	8.909	2.492e-09	0.1083	intron	NA
chr11:116935158:G:T	rs1187962964	N	N	N	chr11	116935158	SIK3	NA	q23.3	G	T	8986	8.853	6.934e-09	0.1014	intron	NA
chr11:116935158:G:T	rs144015791	N	N	N	chr11	116935158	SIK3	SIK3	q23.3	G	T	8986	8.853	6.934e-09	0.1014	intron	intron
chr11:116952956:T:C	rs1473326	N	N	N	chr11	116952956	SIK3	SIK3	q23.3	T	C	9145	9.2	9.217e-10	0.1078	intron, near-gene-5	intron
chr11:116965633:C:T	rs77320801	N	N	N	chr11	116965633	SIK3	SIK3	q23.3	C	T	9053	9.231	1.291e-09	0.1043	intron	intron
chr11:116969045:T:C	rs1241657	Y	N	N	chr11	116969045	SIK3	SIK3	q23.3	T	T	8966	10.7	7.274e-11	0.08861	intron	intron
chr11:116992102:A:T	rs607273	Y	N	N	chr11	116992102	SIK3	SIK3	q23.3	A	A	9020	10.19	3.187e-10	0.0903	intron	intron
chr11:117029070:G:A	rs112120205	N	N	N	chr11	117029070	SIK3	SIK3	q23.3	G	A	9047	8.834	4.833e-09	0.1042	intron	intron
chr11:117034748:G:C	rs4938326	Y	N	N	chr11	117034748	SIK3	SIK3	q23.3	G	C	9113	9.063	1.517e-09	0.1085	intron	intron
chr11:117037567:A:G	rs7115242	Y	N	Y	chr11	117037567	SIK3	SIK3	q23.3	A	A	9064	10.68	3.131e-11	0.09212	intron	intron
chr11:117045962:T:C	rs76972960	N	N	N	chr11	117045962	SIK3	SIK3	q23.3	T	C	9090	8.881	4.347e-09	0.1062	intron	intron
chr11:117047330:C:A	rs74328581	N	N	N	chr11	117047330	SIK3	SIK3	q23.3	C	A	8984	9.128	6.742e-09	0.09762	intron	intron
chr11:117052138:A:G	rs78442878	N	N	N	chr11	117052138	SIK3	SIK3	q23.3	A	G	9061	9.064	1.721e-10	0.1226	intron	intron
chr11:117053602:G:A	rs80259223	N	N	N	chr11	117053602	SIK3	SIK3	q23.3	G	A	8922	8.987	4.471e-09	0.1053	intron	intron
chr11:117102178:C:A	rs4938338	Y	N	N	chr11	117102178	NA	SIK3	q23.3	C	A	9033	9.731	1.678e-10	0.1049	unknown	upstream
chr11:117112840:G:A	rs111560312	N	N	N	chr11	117112840	NA	AP000936.5	q23.3	G	A	8957	10.54	1.167e-11	0.09981	unknown	downstream
chr11:117114150:G:A	rs55703909	N	N	N	chr11	117114150	NA	AP000936.5	q23.3	G	A	8978	10.79	2.514e-12	0.1028	unknown	downstream
chr11:117119266:C:T	rs74428560	N	N	N	chr11	117119266	NA	AP000936.5	q23.3	C	T	8878	10.25	6.225e-11	0.09811	unknown	upstream
chr11:117125823:G:A	rs17120347	Y	N	N	chr11	117125823	NA	AP000936.5	q23.3	G	A	8064	10.29	6.659e-10	0.09084	unknown	intergenic
chr11:117204850:C:T	rs508487	Y	N	Y	chr11	117204850	TAGLN, PCSK7	PCSK7	q23.3	C	T	9180	11.38	1.973e-09	0.06324	near-gene-3, untranslated-3	3_prime_UTR
chr11:118504857:G:A	rs143843795	N	N	N	chr11	118504857	KMT2A	KMT2A	q23.3	G	A	9182	128.5	9.355e-11	0.0005445	missense	missense
chr11:127920094:C:T	rs113646040	N	N	N	chr11	127920094	NA	RP11NA676M6.1	q24.3	C	T	8722	72.89	6.866e-09	0.001319	unknown	intergenic
chr11:131064606:G:T	rs117065004	N	N	N	chr11	131064606	NA	AP002806.1	q25	G	T	9179	138.7	3.386e-12	0.0005447	unknown	intergenic
chr11:131065687:C:T	rs117971498	N	N	N	chr11	131065687	NA	AP002806.1	q25	C	T	9180	138.7	3.392e-12	0.0005447	unknown	intergenic
chr11:131067324:A:G	rs78306149	N	N	N	chr11	131067324	NA	AP002806.1	q25	A	G	9180	138.7	3.379e-12	0.0005447	unknown	intergenic
chr11:131067396:C:T	rs117439389	N	N	N	chr11	131067396	NA	AP002806.1	q25	C	T	9177	138.7	3.385e-12	0.0005448	unknown	intergenic
chr11:131067982:C:A	rs80171200	N	N	N	chr11	131067982	NA	AP002806.1	q25	C	A	9180	138.7	3.379e-12	0.0005447	unknown	intergenic
chr11:131069140:C:A	rs79325450	N	N	N	chr11	131069140	NA	AP002806.1	q25	C	A	9177	138.8	3.208e-12	0.0005448	near-gene-5	intergenic
chr11:131069644:G:T	rs117713367	N	N	N	chr11	131069644	NA	AP002806.1	q25	G	T	9043	123.8	7.803e-11	0.0006082	near-gene-5	intergenic
chr11:131070320:T:A	rs75202391	N	N	N	chr11	131070320	LOC107984411	AP002806.1	q25	T	A	9182	124	7.198e-11	0.000599	ncRNA	intergenic
chr11:131071207:C:T	rs80266660	N	N	N	chr11	131071207	LOC107984411	AP002806.1	q25	C	T	9180	124	7.189e-11	0.0005991	ncRNA	intergenic
chr11:131071338:A:G	rs117363235	N	N	N	chr11	131071338	LOC107984411	AP002806.1	q25	A	G	9181	124	7.195e-11	0.0005991	ncRNA	intergenic
chr11:131071459:A:ATT	rs535998677	N	N	N	chr11	131071459	LOC107984411	NA	q25	A	ATT	9177	123.9	7.288e-11	0.0005993	ncRNA	NA
chr11:131071586:C:T	rs75888446	N	N	N	chr11	131071586	LOC107984411	AP002806.1	q25	C	T	9179	114.1	3.729e-10	0.0006537	ncRNA	intergenic
chr11:131071976:A:C	rs117379682	N	N	N	chr11	131071976	LOC107984411	AP002806.1	q25	A	C	9181	124	7.195e-11	0.0005991	ncRNA	intergenic
chr11:131072055:C:T	rs118133342	N	N	N	chr11	131072055	LOC107984411	AP002806.1	q25	C	T	9180	124	7.212e-11	0.0005991	ncRNA	intergenic
chr11:131072969:G:A	rs79072879	N	N	N	chr11	131072969	LOC107984411	AP002806.1	q25	G	A	9179	124	7.226e-11	0.0005992	ncRNA	intergenic
chr11:131074696:T:A	rs118161736	N	N	N	chr11	131074696	LOC107984411	AP002806.1	q25	T	A	9180	131.6	4.34e-11	0.0005447	near-gene-3, ncRNA	intergenic
chr11:131074825:G:T	rs74967299	N	N	N	chr11	131074825	LOC107984411	AP002806.1	q25	G	T	9181	124	7.195e-11	0.0005991	near-gene-3, ncRNA	intergenic
chr11:131074932:T:C	rs77246658	N	N	N	chr11	131074932	LOC107984411, LOC105369579	AP002806.1	q25	T	C	9181	121.6	1.076e-09	0.0005446	intron, ncRNA	intergenic
chr11:131074940:T:G	rs75720430	N	N	N	chr11	131074940	LOC107984411, LOC105369579	AP002806.1	q25	T	G	9181	121.6	1.076e-09	0.0005446	intron, ncRNA	intergenic
chr11:131075461:A:G	rs75124308	N	N	N	chr11	131075461	LOC107984411, LOC105369579	AP002806.1	q25	A	G	9181	124	7.195e-11	0.0005991	intron, ncRNA	intergenic
chr11:131079762:C:T	rs79850624	N	N	N	chr11	131079762	LOC107984411, LOC105369579	AP002806.1	q25	C	T	9182	124	7.198e-11	0.000599	intron, ncRNA	intergenic
chr11:131083468:G:A	rs75031987	N	N	N	chr11	131083468	LOC107984411, LOC105369579	AP002806.1	q25	G	A	9182	124	7.198e-11	0.000599	intron, ncRNA	intergenic
chr11:131085694:T:C	rs76805648	N	N	N	chr11	131085694	LOC107984411	AP002806.1	q25	T	C	9182	124	7.198e-11	0.000599	intron	intergenic
chr11:131089005:A:T	rs1491219037	N	N	N	chr11	131089005	NA	NA	q25	A	T	9180	131.6	4.34e-11	0.0005447	unknown	NA
chr11:131089005:A:T	rs77530923	N	N	N	chr11	131089005	NA	AP002806.1	q25	A	T	9180	131.6	4.34e-11	0.0005447	unknown	intergenic
chr12:32062627:G:A	rs111562458	N	N	N	chr12	32062627	LOC107984473	RP11NA843B15.1	p11.21	G	A	9107	117.1	4.245e-09	0.000549	intron	intergenic
chr12:51069184:C:A	rs149419152	N	N	N	chr12	51069184	CSRNP2	CSRNP2	q13.12	C	A	8852	65.76	3.738e-12	0.002429	intron, near-gene-3	intron
chr12:75010058:A:T	rs117301130	N	N	N	chr12	75010058	NA	RP11NA81K13.1	q21.1	A	T	9048	134	2.125e-12	0.0006079	unknown	intergenic
chr12:88773371:A:G	rs7969072	N	N	N	chr12	88773371	NA	RP11NA900F13.2	q21.33	A	G	9161	125.4	3.142e-10	0.0005458	unknown	intergenic
chr12:88782958:C:A	rs115946218	N	N	N	chr12	88782958	LOC105369887	RP11NA900F13.2	q21.33	C	A	9161	125.4	3.142e-10	0.0005458	intron	intergenic
chr12:121236795:G:A	rs73403877	N	N	N	chr12	121236795	NA	CAMKK2	q24.31	G	A	8952	120.3	1.493e-09	0.0005585	unknown	downstream
chr12:121254415:G:A	rs111629519	N	N	N	chr12	121254415	CAMKK2	CAMKK2	q24.31	G	A	8957	127.4	1.537e-10	0.0005582	intron	intron
chr12:123470716:G:A	rs116406654	N	N	N	chr12	123470716	SNRNP35, RILPL1	RILPL1	q24.31	G	A	8834	102.6	4.931e-09	0.0007358	intron, near-gene-3	3_prime_UTR
chr12:130728294:C:T	rs117258420	N	N	N	chr12	130728294	NA	RP11NA662M24.2	q24.33	C	T	9132	107.9	2.901e-09	0.000657	unknown	intergenic
chr13:40493106:C:T	rs112019450	N	N	N	chr13	40493106	NA	FOXO1	q14.11	C	T	9143	122.3	1.073e-10	0.0006016	unknown	intron
chr13:40493515:A:G	rs112944119	N	N	N	chr13	40493515	NA	FOXO1	q14.11	A	G	9102	110.1	2.777e-10	0.0007141	unknown	intron
chr13:59573723:T:A	rs75841728	N	N	N	chr13	59573723	LOC107984625	DIAPH3	q21.2	T	A	8878	120.3	1.563e-09	0.0005632	intron	intergenic
chr13:69944051:C:T	rs76932328	N	N	N	chr13	69944051	KLHL1	KLHL1	q21.33	C	T	8942	117.3	3.687e-09	0.0005592	intron	intron
chr13:77188610:C:T	rs77717774	N	N	N	chr13	77188610	MYCBP2	MYCBP2	q22.3	C	T	9103	105.4	6.638e-09	0.0006591	intron	intron
chr13:77425195:A:G	rs77355972	N	N	N	chr13	77425195	NA	MYCBP2	q22.3	A	G	9081	105.9	1.626e-09	0.0007158	unknown	intergenic
chr13:77425434:C:A	rs77823445	N	N	N	chr13	77425434	NA	MYCBP2	q22.3	C	A	9081	146.5	2.146e-13	0.0005506	unknown	intergenic
chr13:77429847:G:A	rs79241903	N	N	N	chr13	77429847	NA	MYCBP2	q22.3	G	A	9081	106.1	1.496e-09	0.0007158	unknown	intergenic
chr14:33284120:G:A	rs74243512	N	N	N	chr14	33284120	NPAS3	NPAS3	q13.1	G	A	8813	82.33	6.779e-09	0.001135	intron	intron
chr14:51163038:C:G	rs76059067	N	N	N	chr14	51163038	NA	TRIM9	q22.1	C	G	8944	152.4	2.458e-14	0.000559	unknown	intergenic
chr14:51198073:T:A	rs79608133	N	N	N	chr14	51198073	NA	TMX1	q22.1	T	A	8753	127.7	4.265e-14	0.0007997	unknown	intergenic
chr14:91224705:T:C	rs116271183	N	N	N	chr14	91224705	DGLUCY	C14orf159	q32.11	T	C	3979	69.98	3.02e-09	0.004021	coding-synon	synonymous
chr14:96229828:T:C	rs10143380	N	N	N	chr14	96229828	BDKRB2	BDKRB2	q32.2	T	C	8907	81.21	9.52e-11	0.001403	intron	intron
chr14:97477903:C:T	rs79933122	N	N	N	chr14	97477903	LINC02325	CTDNA2506J14.1	q32.2	C	T	9107	111.5	4.03e-09	0.0006039	intron	intron
chr14:97480812:G:A	rs1483997	N	N	N	chr14	97480812	LINC02325	CTDNA2506J14.1	q32.2	G	A	9108	110.8	5.094e-09	0.0006039	intron	intron
chr15:44800583:T:A	rs1005341293	N	N	N	chr15	44800583	NA	NA	q21.1	T	A	8727	110.9	1.597e-12	0.0009167	unknown	NA
chr15:44800583:T:A	rs551784765	N	N	N	chr15	44800583	NA	CTDNA2008A1.3	q21.1	T	A	8727	110.9	1.597e-12	0.0009167	unknown	intergenic
chr15:44800583:T:A	rs1408335279	N	N	N	chr15	44800583	NA	NA	q21.1	T	A	8727	110.9	1.597e-12	0.0009167	unknown	NA
chr16:7825888:G:A	rs78993962	N	N	N	chr16	7825888	NA	CTDNA2535I10.1	p13.2	G	A	9147	121.6	1.002e-09	0.0005466	unknown	intergenic
chr16:22700840:G:T	rs149368703	N	N	N	chr16	22700840	NA	RN7SL245P	p12.2	G	T	9176	110	1.241e-11	0.0008173	unknown	intergenic
chr16:22878612:A:C	rs189752277	N	N	N	chr16	22878612	HS3ST2	HS3ST2	p12.2	A	C	8787	94.24	1.754e-10	0.001024	intron	intron
chr16:22897562:T:C	rs117472966	N	N	N	chr16	22897562	HS3ST2	HS3ST2	p12.2	T	C	8707	81.44	1.146e-09	0.001263	intron	intron
chr16:84023913:C:A	rs142893706	N	N	N	chr16	84023913	SLC38A8	SLC38A8	q23.3	C	A	7349	100.3	1.1e-09	0.0009525	intron	intron
chr17:38979565:A:G	rs141623482	N	N	N	chr17	38979565	NA	FBXO47	q12	A	G	9157	86.66	7.432e-10	0.001092	unknown	intergenic
chr17:38999473:C:A	rs143541122	N	N	N	chr17	38999473	NA	RP1NA56K13.6	q12	C	A	9151	89.47	4.548e-09	0.0009289	unknown	upstream
chr17:65077252:G:A	rs73341868	N	N	N	chr17	65077252	NA	GNA13	q24.1	G	A	9142	101.1	1.677e-09	0.0007657	unknown	intergenic
chr19:17377130:G:A	rs142410285	N	N	N	chr19	17377130	PLVAP	PLVAP	p13.11	G	A	9183	115	3.806e-11	0.0007078	coding-synon, missense	synonymous
chr19:35352444:C:A	rs74530614	N	N	N	chr19	35352444	FFAR1	FFAR1	q13.12	C	A	8387	112.7	3.383e-09	0.0006558	missense	missense
chr19:44912921:G:T	rs483082	Y	N	Y	chr19	44912921	NA	APOC1	q13.32	G	T	8633	7.164	7.593e-10	0.2014	near-gene-5	upstream
chr19:44914381:C:CTTCG	rs79626409	N	N	N	chr19	44914381	APOC1	APOC1	q13.32	C	CTTCG	8733	7.23	7.232e-10	0.2016	near-gene-5, untranslated-5	5_prime_UTR
chr19:44914381:C:CTTCG	rs34954997	N	N	N	chr19	44914381	APOC1	NA	q13.32	C	CTTCG	8733	7.23	7.232e-10	0.2016	near-gene-5, untranslated-5	NA
chr19:44915533:T:C	rs5117	Y	N	Y	chr19	44915533	APOC1	APOC1	q13.32	T	C	8521	7.144	2.12e-09	0.1973	intron	intron
chr20:714087:C:T	rs73574932	N	N	N	chr20	714087	NA	RP5NA971N18.3	p13	C	T	8428	111.1	4.865e-09	0.0006526	unknown	intergenic
chr20:13995820:C:T	rs199644824	N	N	N	chr20	13995820	MACROD2	MACROD2	p12.1	C	T	8733	90.89	9.932e-11	0.001145	intron, near-gene-5	intron
chr20:17238543:T:A	rs77003882	N	N	N	chr20	17238543	PCSK2, LOC105372546	PCSK2	p12.1	T	A	9002	69.31	1.731e-09	0.001722	intron	intron
chr20:23085832:C:T	rs377356934	N	N	N	chr20	23085832	CD93	NA	p11.21	C	T	8826	113.1	1.905e-09	0.0006232	ncRNA, nonsense, missense	NA
chr20:23085832:C:T	rs762805003	N	N	N	chr20	23085832	CD93	NA	p11.21	C	T	8826	113.1	1.905e-09	0.0006232	ncRNA, frameshift	NA
chr20:58659631:C:T	rs73598392	N	N	N	chr20	58659631	STX16, STX16-NPEPL1	NA	q13.32	C	T	9178	99.85	3.709e-09	0.0007627	coding-synon, intron, ncRNA, missense, untranslated-5	NA
chr20:61531775:C:T	rs58475007	N	N	N	chr20	61531775	CDH4	CDH4	q13.33	C	T	6683	66.76	6.429e-10	0.002619	intron	intron
chr21:14873926:G:GA	rs140370838	N	N	N	chr21	14873926	LINC02246	AF127936.9	q11.2	G	GA	8904	101.4	7.681e-09	0.00073	intron	indel
chr22:27753940:C:T	rs117883084	N	N	N	chr22	27753940	MN1	MN1	q12.1	C	T	9165	113.1	5.336e-10	0.0006547	intron	intron
chr22:27754744:G:A	rs117093564	N	N	N	chr22	27754744	MN1	MN1	q12.1	G	A	9180	109.8	3.557e-10	0.0007081	intron	intron
chr22:27754875:C:A	rs117587429	N	N	N	chr22	27754875	MN1	MN1	q12.1	C	A	9177	109.8	3.612e-10	0.0007083	intron	intron
chr22:27755602:C:G	rs45556837	N	N	N	chr22	27755602	MN1	MN1	q12.1	C	G	9158	116.4	1.697e-10	0.0006552	intron	intron
chr22:27757334:G:C	rs117523006	N	N	N	chr22	27757334	MN1	MN1	q12.1	G	C	9140	133.7	2.287e-12	0.0006018	intron	intron
chr22:27763874:G:C	rs3819654	N	N	N	chr22	27763874	MN1	MN1	q12.1	G	C	8856	127.2	1.98e-11	0.000621	intron	intron
chr22:30364458:A:G	rs78307446	N	N	N	chr22	30364458	CCDC157	CCDC157	q12.2	A	G	9097	118.6	2.503e-09	0.0005496	intron	intron
chr22:44440498:G:A	rs114403089	N	N	N	chr22	44440498	NA	LINC01656	q13.31	G	A	9018	124.5	5.193e-11	0.0006099	unknown	upstream
chr22:44440705:G:C	rs75275271	N	N	N	chr22	44440705	NA	LINC01656	q13.31	G	C	9030	114.7	2.753e-10	0.0006645	unknown	upstream
chr22:48651935:T:C	rs79823540	N	N	N	chr22	48651935	FAM19A5, TAFA5	FAM19A5	q13.32	T	C	9150	129.9	6.6e-11	0.0005464	intron	intron
chr22:48667437:GAT:G	rs200875316	N	N	N	chr22	48667437	FAM19A5, TAFA5	NA	q13.32	GAT	G	9175	127.8	1.351e-10	0.000545	intron	NA
			N	N													NA
**Note that some variants may have multiple rsIDs
